# Supplementary material for: A convenient synthetic route to useful monobranched polyethoxylated halogen terminated [3,3-Co(1,2-C2B9H11)2]−synthons
Source: Royal Society of Chemistry journal article supplement (doi:10.1039/b924798j), 2009-12-15
Supplement: b924798j.pdf [file b924798j.pdf]

## A convenient synthetic route to useful monobranched polyetoxyated halogen terminated [3,3-Co(1,2-C<sub>2</sub>B<sub>9</sub>H<sub>11</sub>)<sub>2</sub>]<sup>-</sup> synthons

Pau Farràs,<sup>a</sup> Reijo Sillanpää,<sup>b</sup> Francesc Teixidor,<sup>a</sup> Clara Viñas,<sup>a,\*</sup>

<sup>a</sup> *Institut de Ciència de Materials de Barcelona (CSIC), Campus de la U.A.B., E-08193 Bellaterra, Spain. Telefax: Int. Code + 34 93 5805729. E-mail: clara@icmab.es.*

<sup>b</sup> *Department of Chemistry, University of Jyväskylä, FIN-40014, Finland.*

### SUPPORTING INFORMATION

|                                                                                   | Page |
|-----------------------------------------------------------------------------------|------|
| Experimental                                                                      | S2   |
| Spectral Data                                                                     | S8   |
| Crystal Structure Information for [N(CH <sub>3</sub> ) <sub>4</sub> ][ <b>5</b> ] | S32  |
| Crystal Structure Information for [N(CH <sub>3</sub> ) <sub>4</sub> ][ <b>6</b> ] | S32  |

## Experimental Section

**Instrumentation.** Elemental analyses were performed using a Carlo Erba EA1108 microanalyzer. IR spectra were recorded from KBr pellets on a Shimadzu FTIR-8300 spectrophotometer. The magnetic resonance spectra were recorded with a Bruker ARX 300 and Bruker AdvancedII instruments equipped with the appropriate decoupling accessories. Chemical shifts are reported in units of parts per million downfield from the reference, and all coupling constants are reported in Hertz. The mass spectra were recorded in the negative ion mode using a Bruker Biflex MALDI-TOF-MS (N<sub>2</sub> laser;  $\lambda_{\text{exc}}$  337 nm (0.5 ns pulses); voltage ion source 20.00 kV (Uis1) and 17.50 kV (Uis2)).

**Materials.** Experiments were carried out, except when noted, under air with some subsequent manipulation in the open laboratory. Tetrahydrofuran (THF) and ethanol (EtOH) were used as received. Other solvents were reagent grade. All organic and inorganic salts were Fluka or Aldrich analytical reagent grade and were used as received. [3,3'-Co(8-(OCH<sub>2</sub>CH<sub>2</sub>)<sub>2</sub>-1,2-C<sub>2</sub>B<sub>9</sub>H<sub>10</sub>)(1',2'-C<sub>2</sub>B<sub>9</sub>H<sub>11</sub>)] [2] was prepared according to the literature.<sup>1</sup>

**Synthesis of Na[3,3'-Co(8-(OCH<sub>2</sub>CH<sub>2</sub>)<sub>2</sub>F-1,2-C<sub>2</sub>B<sub>9</sub>H<sub>10</sub>)(1',2'-C<sub>2</sub>B<sub>9</sub>H<sub>11</sub>)]·2Et<sub>2</sub>O, Na[3].** Hydrofluoric acid (7.6  $\mu$ L, 0.488 mmol) (48% in water) was added dropwise to a stirred solution of [2] (200 mg, 0.49 mmol) in 10 mL of THF at 0 °C. The resulting solution was stirred overnight. The solvent was removed and acidic water (10 mL) (1 M HCl) was added to the orange residue. This was extracted with diethyl ether (3x10 mL). The organic phase was then extracted by NaHCO<sub>3</sub>(aq) (3x10mL) and NaCl(aq) (3x10mL). The solvent was removed and the resulting orange precipitate was washed with water and petroleum ether, and dried in vacuo, giving the desired compound Na[3]·2Et<sub>2</sub>O (0.23 g, 80%). (Found: C, 32.1; H, 8.1%. Calcd for C<sub>16</sub>H<sub>49</sub>B<sub>18</sub>CoFNaO<sub>4</sub>: C, 31.9; H, 8.2%);  $\mu_{\text{max}}/\text{cm}^{-1}$  3043 (C<sub>c</sub>-H), 2926 and 2870 (C<sub>alkyl</sub>-H), 2568 and 2517 (B-H), 1453 and 1352 (CH<sub>2</sub>), 1148, 1133, 1120 and 1099 (C-O-C) and 1056 (C-F);  $\delta_{\text{H}}$ (300 MHz; CD<sub>3</sub>COCD<sub>3</sub>; (CH<sub>3</sub>)<sub>4</sub>Si) 4.16 (2H, br s, C<sub>c</sub>-H), 4.13 (2H, br s, C<sub>c</sub>-H), 3.67 (2H, m, OCH<sub>2</sub>CH<sub>2</sub>), 3.55 (2H, t, *J* 5, OCH<sub>2</sub>CH<sub>2</sub>), 3.39 (8H, q, *J* 7, Et<sub>2</sub>O), 3.27 (4H, m, OCH<sub>2</sub>CH<sub>2</sub>), 2.88-1.43 (17H, m, B-H), 1.09 (12H, t, *J* 7, Et<sub>2</sub>O);  $\delta_{\text{H}\{\text{B}\}}$ (300 MHz; CD<sub>3</sub>COCD<sub>3</sub>; (CH<sub>3</sub>)<sub>4</sub>Si) 4.16 (2H, br s, C<sub>c</sub>-H), 4.13 (2H, br s, C<sub>c</sub>-H), 3.67 (2H, m, OCH<sub>2</sub>CH<sub>2</sub>), 3.55 (2H, t, *J* 5, OCH<sub>2</sub>CH<sub>2</sub>), 3.39 (8H, q, *J* 7, Et<sub>2</sub>O), 3.27 (4H, m,

OCH<sub>2</sub>CH<sub>2</sub>), 2.88 (4H, s, B-H), 2.68 (4H, s, B-H), 2.00 (2H, s, B-H), 1.80 (2H, s, B-H), 1.66 (1H, s, B-H), 1.61 (2H, s, B-H), 1.52 (1H, s, B-H), 1.43 (1H, s, B-H), 1.09 (12H, t, *J* 7, Et<sub>2</sub>O); δ<sub>C</sub>(75 MHz; CD<sub>3</sub>COCD<sub>3</sub>; (CH<sub>3</sub>)<sub>4</sub>Si) 72.0 (1C, s, OCH<sub>2</sub>), 71.6 (1C, s, OCH<sub>2</sub>), 68.3 (1C, s, OCH<sub>2</sub>), 62.9 (4C, s, Et<sub>2</sub>O), 60.8 (1C, s, CH<sub>2</sub>F), 53.3 (2C, s, C<sub>c</sub>-H), 46.6 (2C, s, C<sub>c</sub>-H), 14.7 (4C, s, Et<sub>2</sub>O); δ<sub>B</sub>(96 MHz; CD<sub>3</sub>COCD<sub>3</sub>; BF<sub>3</sub>·OEt<sub>2</sub>) 24.5 (1B, s, B(8)), 5.9 (1B, d, *J* 134), 1.3 (1B, d, *J* 140), -1.6 (1B, d, *J* 170), -3.7 (2B, d, *J* 160), -6.3 (4B, d, *J* 132), -7.4 (2B, d, *J* 133), -16.4 (2B, d, *J* 154), -19.5 (2B, d, *J* 155), -21.2 (1B, d, *J* 158), -27.7 (1B, d, *J* 156); *m/z* (MALDI-TOF-MS) 456.2 (M+2(CH<sub>2</sub>), 13.7%), 442.2 (M+CH<sub>2</sub>, 8.4), 428.2 (M, 67.9), 338.6 (M-C<sub>4</sub>H<sub>8</sub>OF, 5.3) and 323.5 (M-C<sub>4</sub>H<sub>8</sub>O<sub>2</sub>F, 4.7).

**Synthesis of Cs[3,3'-Co(8-(OCH<sub>2</sub>CH<sub>2</sub>)<sub>2</sub>Cl-(1,2-C<sub>2</sub>B<sub>9</sub>H<sub>10</sub>)(1',2'-C<sub>2</sub>B<sub>9</sub>H<sub>11</sub>)], Cs[4].** This compound was prepared using the same procedure as for Na[3], but using hydrochloric acid (0.101 mL, 1.22 mmol) instead of hydrofluoric acid and CsCl to isolate the Cs<sup>+</sup> salt of [4]<sup>-</sup> (0.42 g, 88 %). (Found: C, 16.4; H, 5.1%. Calcd for C<sub>8</sub>H<sub>29</sub>B<sub>18</sub>CoCsO<sub>2</sub>: C, 16.5; H, 5.0%); μ<sub>max</sub>/cm<sup>-1</sup> 3041 (C<sub>c</sub>-H), 2923 and 2880 (C<sub>alkyl</sub>-H), 2565 and 2521 (B-H), 1448 and 1356 (CH<sub>2</sub>) and 1151, 1138, 1117 and 1095 (C-O-C); δ<sub>H</sub>(300 MHz; CD<sub>3</sub>COCD<sub>3</sub>; (CH<sub>3</sub>)<sub>4</sub>Si) 4.24 (4H, br s, C<sub>c</sub>-H), 3.72 (2H, m, OCH<sub>2</sub>CH<sub>2</sub>), 3.68 (2H, m, OCH<sub>2</sub>CH<sub>2</sub>), 3.60 (4H, m, OCH<sub>2</sub>CH<sub>2</sub>), 2.90-1.46 (17H, m, B-H); δ<sub>H{B}</sub>(300 MHz; CD<sub>3</sub>COCD<sub>3</sub>; (CH<sub>3</sub>)<sub>4</sub>Si) 4.24 (4H, br s, C<sub>c</sub>-H), 3.72 (2H, m, OCH<sub>2</sub>CH<sub>2</sub>), 3.68 (2H, m, OCH<sub>2</sub>CH<sub>2</sub>), 3.60 (4H, m, OCH<sub>2</sub>CH<sub>2</sub>), 2.90 (3H, s, B-H), 2.74 (2H, s, B-H), 2.68 (1H, s, B-H), 2.47 (1H, s, B-H), 1.98 (2H, s, B-H), 1.78 (2H, s, B-H), 1.68 (1H, s, B-H), 1.64 (2H, s, B-H), 1.55 (2H, s, B-H), 1.46 (1H, s, B-H); δ<sub>C</sub>(75 MHz; CD<sub>3</sub>COCD<sub>3</sub>; (CH<sub>3</sub>)<sub>4</sub>Si) 71.9 (1C, s, OCH<sub>2</sub>), 71.0 (1C, s, OCH<sub>2</sub>), 68.4 (1C, s, OCH<sub>2</sub>), 54.0 (2C, s, C<sub>c</sub>-H), 46.5 (2C, s, C<sub>c</sub>-H), 43.1 (1C, s, CH<sub>2</sub>Cl); δ<sub>B</sub>(96 MHz; CD<sub>3</sub>COCD<sub>3</sub>; BF<sub>3</sub>·OEt<sub>2</sub>) 25.4 (1B, s, B(8)), 6.6 (1B, d, *J* 137), 2.7 (1B, d, *J* 140), -0.2 (1B, d, *J* 157), -2.0 (2B, d, *J* 162), -5.0 (2B, d, *J* 128), -5.9 (4B, d, *J* 115), -15.0 (2B, d, *J* 154), -18.1 (2B, d, *J* 154), -19.7 (1B, d, *J* 158), -26.2 (1B, d, *J* 158); *m/z* (MALDI-TOF-MS) 446.2 (M, 100).

**Synthesis of N(CH<sub>3</sub>)<sub>4</sub>[3,3'-Co(8-(OCH<sub>2</sub>CH<sub>2</sub>O)<sub>2</sub>Br-1,2-C<sub>2</sub>B<sub>9</sub>H<sub>10</sub>)(1',2'-C<sub>2</sub>B<sub>9</sub>H<sub>11</sub>)], [N(CH<sub>3</sub>)<sub>4</sub>][5].** This compound was prepared using the same procedure as for Na[3], but using hydrobromic acid (0.17 mL, 1.22 mmol) instead of hydrofluoric acid and [N(CH<sub>3</sub>)<sub>4</sub>]Cl to isolate the [N(CH<sub>3</sub>)<sub>4</sub>]<sup>+</sup> salt of [5]<sup>-</sup> (0.56 g, 81%). (Found: C, 25.8; H, 7.8; N, 2.5%. Calcd for C<sub>12</sub>H<sub>41</sub>B<sub>18</sub>CoNO<sub>2</sub>: C, 25.5; H, 7.4; N, 2.5 %); μ<sub>max</sub>/cm<sup>-1</sup> 3045 (C<sub>c</sub>-H),

2875 (C<sub>alkyl</sub>-H), 2561 and 2523 (B-H), 1455 and 1364 (CH<sub>2</sub>), 1151, 1128, 1116 and 1094 (C-O-C) and 944 (C-N);  $\delta_{\text{H}}$ (300 MHz; CD<sub>3</sub>COCD<sub>3</sub>; (CH<sub>3</sub>)<sub>4</sub>Si) 4.25 (4H, br s, C<sub>c</sub>-H), 3.79 (2H, t, *J* 5, OCH<sub>2</sub>CH<sub>2</sub>), 3.56 (4H, m, OCH<sub>2</sub>CH<sub>2</sub>), 3.53 (2H, m, OCH<sub>2</sub>CH<sub>2</sub>), 3.44 (12H, s, N(CH<sub>3</sub>)<sub>4</sub>), 2.89-1.45 (17H, m, B-H);  $\delta_{\text{H}\{\text{B}\}}$ (300 MHz; CD<sub>3</sub>COCD<sub>3</sub>; (CH<sub>3</sub>)<sub>4</sub>Si) 4.25 (4H, br s, C<sub>c</sub>-H), 3.79 (2H, t, *J* 5, OCH<sub>2</sub>CH<sub>2</sub>), 3.56 (4H, m, OCH<sub>2</sub>CH<sub>2</sub>), 3.53 (2H, m, OCH<sub>2</sub>CH<sub>2</sub>), 3.44 (12H, s, N(CH<sub>3</sub>)<sub>4</sub>), 2.89 (3H, s, B-H), 2.75 (2H, s, B-H), 2.68 (1H, s, B-H), 2.43 (1H, s, B-H), 1.97 (2H, s, B-H), 1.77 (2H, s, B-H), 1.70 (1H, s, B-H), 1.65 (2H, s, B-H), 1.55 (2H, s, B-H), 1.45 (1H, s, B-H);  $\delta_{\text{C}}$ (75 MHz; CD<sub>3</sub>COCD<sub>3</sub>; (CH<sub>3</sub>)<sub>4</sub>Si) 71.6 (1C, s, OCH<sub>2</sub>), 70.9 (1C, s, OCH<sub>2</sub>), 68.5 (1C, s, OCH<sub>2</sub>), 55.3 (4C, s, N(CH<sub>3</sub>)<sub>4</sub>), 54.3 (2C, s, C<sub>c</sub>-H), 46.4 (2C, s, C<sub>c</sub>-H), 31.0 (1C, s, CH<sub>2</sub>Br);  $\delta_{\text{B}}$ (96 MHz; CD<sub>3</sub>COCD<sub>3</sub>; BF<sub>3</sub>·OEt<sub>2</sub>) 23.7 (1B, s, B(8)), 4.8 (1B, d, *J* 136), 1.3 (1B, d, *J* 141), -1.6 (1B, d, *J* 155), -3.4 (2B, d, *J* 160), -6.6 (2B, d, *J* 96), -7.5 (4B, d, *J* 126), -16.4 (2B, d, *J* 153), -19.6 (2B, d, *J* 192), -21.1 (1B, d, *J* 155), -27.6 (1B, d, *J* 162); *m/z* (MALDI-TOF-MS) 491.2 (M, 63.6%), 428.0 (M-Br+OH, 9.6), 410.9 (M-Br, 12.6), 382.8 (M-Br-C<sub>2</sub>H<sub>4</sub>, 3.2), 365.7 (M-Br-C<sub>2</sub>H<sub>4</sub>O, 5.1), 337.6 (M-C<sub>4</sub>H<sub>8</sub>OBr, 4.3) and 323.5 (M-C<sub>4</sub>H<sub>8</sub>O<sub>2</sub>Br, 1.5).

**Synthesis of [N(CH<sub>3</sub>)<sub>4</sub>][3,3'-Co(8-(OCH<sub>2</sub>CH<sub>2</sub>)<sub>2</sub>I-1,2-C<sub>2</sub>B<sub>9</sub>H<sub>10</sub>)(1',2'-C<sub>2</sub>B<sub>9</sub>H<sub>11</sub>)], N(CH<sub>3</sub>)<sub>4</sub>[6].** This compound was prepared using the same procedure as for Na[3], but using hydroiodic acid (0.07 mL, 0.49 mmol) instead of hydrofluoric acid and N(CH<sub>3</sub>)<sub>4</sub>Cl to isolate the [N(CH<sub>3</sub>)<sub>4</sub>]<sup>+</sup> salt of [6]<sup>-</sup> (0.24 g, 80%). (Found: C, 23.6; H, 6.8; N, 2.4%. Calcd for C<sub>12</sub>H<sub>41</sub>B<sub>18</sub>CoNO<sub>2</sub>: C, 23.6; H, 6.8; N, 2.3%);  $\mu_{\text{max}}/\text{cm}^{-1}$  3043 (C<sub>c</sub>-H), 2890 (C<sub>alkyl</sub>-H), 2555 and 2531 (B-H), 1448 and 1376 (CH<sub>2</sub>), 1149, 1125, 1121 and 1099 (C-O-C) and 945 (C-N);  $\delta_{\text{H}}$ (300 MHz; CD<sub>3</sub>COCD<sub>3</sub>; (CH<sub>3</sub>)<sub>4</sub>Si) 4.26 (4H, br s, C<sub>c</sub>-H), 3.71 (2H, t, *J* 6, OCH<sub>2</sub>CH<sub>2</sub>), 3.54 (4H, m, OCH<sub>2</sub>CH<sub>2</sub>), 3.45 (12H, s, N(CH<sub>3</sub>)<sub>4</sub>), 3.30 (2H, t, *J* 6, OCH<sub>2</sub>CH<sub>2</sub>I), 2.89-1.46 (17H, m, B-H);  $\delta_{\text{H}\{\text{B}\}}$ (300 MHz; CD<sub>3</sub>COCD<sub>3</sub>; (CH<sub>3</sub>)<sub>4</sub>Si) 4.26 (4H, br s, C<sub>c</sub>-H), 3.71 (2H, t, *J* 6, OCH<sub>2</sub>CH<sub>2</sub>), 3.54 (4H, m, OCH<sub>2</sub>CH<sub>2</sub>), 3.45 (12H, s, N(CH<sub>3</sub>)<sub>4</sub>), 3.30 (2H, t, *J* 6, OCH<sub>2</sub>CH<sub>2</sub>I), 2.89 (3H, s, B-H), 2.74 (2H, s, B-H), 2.69 (1H, s, B-H), 2.42 (1H, s, B-H), 1.97 (2H, s, B-H), 1.77 (2H, s, B-H), 1.70 (1H, s, B-H), 1.65 (2H, s, B-H), 1.55 (2H, s, B-H), 1.46 (1H, s, B-H);  $\delta_{\text{C}}$ (75 MHz; CD<sub>3</sub>COCD<sub>3</sub>; (CH<sub>3</sub>)<sub>4</sub>Si) 71.6 (1C, s, OCH<sub>2</sub>), 71.5 (1C, s, OCH<sub>2</sub>), 68.4 (1C, s, OCH<sub>2</sub>), 55.2 (4C, s, N(CH<sub>3</sub>)<sub>4</sub>), 54.5 (2C, s, C<sub>c</sub>-H), 46.4 (2C, s, C<sub>c</sub>-H), 3.6 (1C, s, CH<sub>2</sub>I);  $\delta_{\text{B}}$ (96 MHz; CD<sub>3</sub>COCD<sub>3</sub>; BF<sub>3</sub>·OEt<sub>2</sub>) 23.7 (1B, s, B(8)), 4.7 (1B, d, *J* 135), 1.3 (1B, d, *J* 139), -1.6 (1B, d, *J* 157), -3.4 (2B, d, *J* 158), -6.6 (2B, d, *J* 100), -7.5 (4B, d, *J* 122), -16.4 (2B,

d, *J* 153), -19.6 (2B, d, *J* 154), -21.1 (1B, d, *J* 152), -27.6 (1B, d, *J* 166); *m/z* (MALDI-TOF-MS) 664.9 (M+I, 8.0%), 538.4 (M, 24.8), 410.9 (M-I, 21.5), 382.8 (M-I-C<sub>2</sub>H<sub>4</sub>, 10.8), 365.7 (M-I-C<sub>2</sub>H<sub>4</sub>O, 14.2) and 337.6 (M-C<sub>4</sub>H<sub>8</sub>OI, 20.6).

**Synthesis of [N(CH<sub>3</sub>)<sub>4</sub>][3,3'-Co(8-(OCH<sub>2</sub>CH<sub>2</sub>)<sub>2</sub>Br-1,2-C<sub>2</sub>B<sub>9</sub>H<sub>10</sub>)(8'-I-1',2'-C<sub>2</sub>B<sub>9</sub>H<sub>10</sub>)], [N(CH<sub>3</sub>)<sub>4</sub>][7].**

Iodine (26 mg, 0.103 mmol) was added to a stirred solution of N(CH<sub>3</sub>)<sub>4</sub>[5] (29 mg, 0.05 mmol) in 5 mL of EtOH. The reaction mixture was left to stand overnight at room temperature and was then heated under reflux 1.5h. The excess iodine was decomposed by the addition of a solution of Na<sub>2</sub>SO<sub>3</sub> in water and the resulting mixture was evaporated. This was washed with water and the product was redissolved in the minimum volume of ethanol and an aqueous solution containing an excess of N(CH<sub>3</sub>)<sub>4</sub>Cl was added, resulting in the formation of an orange precipitate. This was filtered off, washed with water and petroleum ether, and dried in vacuo, giving the desired compound N(CH<sub>3</sub>)<sub>4</sub>[7] (0.03 g, 81%). (Found: C, 21.2; H, 5.6; N, 2.1%. Calcd for C<sub>12</sub>H<sub>40</sub>B<sub>18</sub>CoNO<sub>2</sub>BrI: C, 20.9; H, 5.8; N, 2.0%);  $\mu_{\max}/\text{cm}^{-1}$  3042 (C<sub>c</sub>-H), 2885 (C<sub>alkyl</sub>-H), 2559 and 2529 (B-H), 1445 and 1371 (CH<sub>2</sub>), 1145, 1129, 1118 and 1096 (C-O-C) and 946 (C-N);  $\delta_{\text{H}}$ (300 MHz; CD<sub>3</sub>COCD<sub>3</sub>; (CH<sub>3</sub>)<sub>4</sub>Si) 4.49 (2H, br s, C<sub>c</sub>-H), 4.19 (2H, br s, C<sub>c</sub>-H), 3.73 (2H, t, *J* 8, OCH<sub>2</sub>CH<sub>2</sub>), 3.56 (4H, t, *J* 6, OCH<sub>2</sub>CH<sub>2</sub>), 3.53 (2H, m, OCH<sub>2</sub>CH<sub>2</sub>), 3.45 (12H, s, N(CH<sub>3</sub>)<sub>4</sub>), 3.16-1.66 (16H, m, B-H);  $\delta_{\text{H}\{\text{B}\}}$ (300 MHz; CD<sub>3</sub>COCD<sub>3</sub>; (CH<sub>3</sub>)<sub>4</sub>Si) 4.49 (2H, br s, C<sub>c</sub>-H), 4.19 (2H, br s, C<sub>c</sub>-H), 3.73 (2H, t, *J* 8, OCH<sub>2</sub>CH<sub>2</sub>), 3.56 (4H, t, *J* 6, OCH<sub>2</sub>CH<sub>2</sub>), 3.53 (2H, m, OCH<sub>2</sub>CH<sub>2</sub>), 3.45 (12H, s, N(CH<sub>3</sub>)<sub>4</sub>), 3.16 (2H, s, B-H), 3.01 (2H, s, B-H), 2.85 (1H, s, B-H), 2.81 (1H, s, B-H), 2.40 (2H, s, B-H), 1.95 (1H, s, B-H), 1.72 (2H, s, B-H), 1.66 (3H, s, B-H);  $\delta_{\text{C}}$ (75 MHz; CD<sub>3</sub>COCD<sub>3</sub>; (CH<sub>3</sub>)<sub>4</sub>Si) 71.6 (1C, s, OCH<sub>2</sub>), 70.8 (1C, s, OCH<sub>2</sub>), 68.1 (1C, s, OCH<sub>2</sub>), 56.5 (2C, s, C<sub>c</sub>-H), 55.3 (4C, s, N(CH<sub>3</sub>)<sub>4</sub>), 54.6 (2C, s, C<sub>c</sub>-H), 30.6 (1C, s, CH<sub>2</sub>Br);  $\delta_{\text{B}}$ (96 MHz; CD<sub>3</sub>COCD<sub>3</sub>; BF<sub>3</sub>·OEt<sub>2</sub>) 22.4 (1B, s, B(8)), 0.3 (2B, d, *J* 136), -3.8 (2B, d, *J* 105), -4.9 (4B, d, *J* 145), -6.5 (2B, d, *J* 127), -6.5 (1B, s, B(8')), -17.1 (2B, d, *J* 180), -19.2 (2B, d, *J* 177), -22.4 (1B, d, *J* 180), -26.6 (1B, d, *J* 175); *m/z* (MALDI-TOF-MS) 617.6 (M, 70.5%), 570.4 (M-I+2Br, 6.8), 537.4 (M-I, 13.7), 492.2 (M-I-Br, 8.9).

**Synthesis of [N(CH<sub>3</sub>)<sub>4</sub>][3,3'-Co(8-(OCH<sub>2</sub>CH<sub>2</sub>)<sub>2</sub>I-1,2-C<sub>2</sub>B<sub>9</sub>H<sub>10</sub>)(8'-I-1',2'-C<sub>2</sub>B<sub>9</sub>H<sub>10</sub>)], [N(CH<sub>3</sub>)<sub>4</sub>][8].** This compound was prepared using the same procedure as for

[N(CH<sub>3</sub>)<sub>4</sub>][7], but using [6]<sup>-</sup> (29 mg, 0.047 mmol) instead of [5]<sup>-</sup>, giving the desired compound N(CH<sub>3</sub>)<sub>4</sub>[8] (0.03 g, 83%). (Found: C, 19.6; H, 5.4; N, 2.0%. Calcd for C<sub>12</sub>H<sub>40</sub>B<sub>18</sub>CoNO<sub>2</sub>I<sub>2</sub>: C, 19.5; H, 5.5; N, 1.9%);  $\mu_{\max}/\text{cm}^{-1}$  3039 (C<sub>c</sub>-H), 2895 (C<sub>alkyl</sub>-H), 2560 and 2538 (B-H), 1442 and 1380 (CH<sub>2</sub>), 1152, 1129, 1118 and 1097 (C-O-C) and 943 (C-N);  $\delta_{\text{H}}$ (300 MHz; CD<sub>3</sub>COCD<sub>3</sub>; (CH<sub>3</sub>)<sub>4</sub>Si) 4.49 (2H, br s, C<sub>c</sub>-H), 4.19 (2H, br s, C<sub>c</sub>-H), 3.68 (2H, t, *J* 6, OCH<sub>2</sub>CH<sub>2</sub>), 3.60 (4H, m, OCH<sub>2</sub>CH<sub>2</sub>), 3.45 (12H, s, N(CH<sub>3</sub>)<sub>4</sub>), 3.30 (2H, t, *J* 6, OCH<sub>2</sub>CH<sub>2</sub>), 3.16-1.66 (16H, m, B-H);  $\delta_{\text{H}\{\text{B}\}}$ (300 MHz; CD<sub>3</sub>COCD<sub>3</sub>; (CH<sub>3</sub>)<sub>4</sub>Si) 4.49 (2H, br s, C<sub>c</sub>-H), 4.19 (2H, br s, C<sub>c</sub>-H), 3.68 (2H, t, *J* 6, OCH<sub>2</sub>CH<sub>2</sub>), 3.60 (4H, m, OCH<sub>2</sub>CH<sub>2</sub>), 3.45 (12H, s, N(CH<sub>3</sub>)<sub>4</sub>), 3.30 (2H, t, *J* 6, OCH<sub>2</sub>CH<sub>2</sub>), 3.16 (2H, s, B-H), 3.00 (2H, s, B-H), 2.85 (1H, s, B-H), 2.77 (1H, s, B-H), 2.36 (2H, s, B-H), 1.95 (1H, s, B-H), 1.72 (2H, s, B-H), 1.66 (3H, s, B-H);  $\delta_{\text{C}}$ (75 MHz; CD<sub>3</sub>COCD<sub>3</sub>; (CH<sub>3</sub>)<sub>4</sub>Si) 71.6 (1C, s, OCH<sub>2</sub>), 71.3 (1C, s, OCH<sub>2</sub>), 68.2 (1C, s, OCH<sub>2</sub>), 56.4 (2C, s, C<sub>c</sub>-H), 55.2 (4C, s, N(CH<sub>3</sub>)<sub>4</sub>), 54.6 (2C, s, C<sub>c</sub>-H), 3.11 (1C, s, CH<sub>2</sub>I);  $\delta_{\text{B}}$ (96 MHz; CD<sub>3</sub>COCD<sub>3</sub>; BF<sub>3</sub>·OEt<sub>2</sub>) 22.4 (1B, s, B(8)), 0.4 (2B, d, *J* 147), -3.9 (2B, d, *J* 109), -4.9 (4B, d, *J* 140), -6.4 (2B, d, *J* 127), -6.4 (1B, s, B(8')), -17.1 (2B, d, *J* 180), -19.2 (2B, d, *J* 177), -22.4 (1B, d, *J* 177), -26.5 (1B, d, *J* 165); *m/z* (MALDI-TOF-MS) 664.2 (M, 100.0%).

**Synthesis of [N(CH<sub>3</sub>)<sub>4</sub>][3,3'-Co(8-(OCH<sub>2</sub>CH<sub>2</sub>)<sub>2</sub>SH-1,2-C<sub>2</sub>B<sub>9</sub>H<sub>10</sub>)(1',2'-C<sub>2</sub>B<sub>9</sub>H<sub>11</sub>)], [N(CH<sub>3</sub>)<sub>4</sub>][9].** This compound was prepared using the same procedure as for Na[3], but using sodium hydrosulfide (15 mg, 0.244 mmol) instead of hydrofluoric acid, and the reaction mixture was heated under reflux for 6h after overnight stirring. After the work-up procedure, the desired [N(CH<sub>3</sub>)<sub>4</sub>][9] was obtained (0.11 g, 85%). (Found: C, 27.8; H, 8.1; N, 2.6; S, 6.4%. Calcd for C<sub>12</sub>H<sub>42</sub>B<sub>18</sub>CoNO<sub>2</sub>S: C, 27.8; H, 8.2; N, 2.7; S, 6.2%);  $\mu_{\max}/\text{cm}^{-1}$  3042 (C<sub>c</sub>-H), 2889 (C<sub>alkyl</sub>-H), 2556 and 2533 (B-H), 1437 and 1376 (CH<sub>2</sub>), 1149, 1125, 1122 and 1101 (C-O-C) and 946 (C-N);  $\delta_{\text{H}}$ (300 MHz; CD<sub>3</sub>COCD<sub>3</sub>; (CH<sub>3</sub>)<sub>4</sub>Si) 4.27 (4H, br s, C<sub>c</sub>-H), 3.70 (2H, t, *J* 6, OCH<sub>2</sub>CH<sub>2</sub>), 3.58 (2H, m, OCH<sub>2</sub>CH<sub>2</sub>), 3.50 (2H, m, OCH<sub>2</sub>CH<sub>2</sub>), 3.44 (12H, s, N(CH<sub>3</sub>)<sub>4</sub>), 2.91 (2H, t, *J* 6, CH<sub>2</sub>SH), 2.92-1.46 (17H, m, B-H), 1.39 (1H, s, S-H);  $\delta_{\text{H}\{\text{B}\}}$ (300 MHz; CD<sub>3</sub>COCD<sub>3</sub>; (CH<sub>3</sub>)<sub>4</sub>Si) 4.27 (4H, br s, C<sub>c</sub>-H), 3.70 (2H, t, *J* 6, OCH<sub>2</sub>CH<sub>2</sub>), 3.58 (2H, m, OCH<sub>2</sub>CH<sub>2</sub>), 3.50 (2H, m, OCH<sub>2</sub>CH<sub>2</sub>), 3.44 (12H, s, N(CH<sub>3</sub>)<sub>4</sub>), 2.91 (2H, t, *J* 6, CH<sub>2</sub>SH), 2.92 (3H, s, B-H), 2.76 (2H, s, B-H), 2.69 (1H, s, B-H), 2.39 (1H, s, B-H), 1.97 (2H, s, B-H), 1.77 (2H, s, B-H), 1.71 (1H, s, B-H), 1.65 (2H, s, B-H), 1.55 (2H, s, B-H), 1.46 (1H, s, B-H), 1.39 (1H, s, S-H);  $\delta_{\text{C}}$ (75 MHz; CD<sub>3</sub>COCD<sub>3</sub>; (CH<sub>3</sub>)<sub>4</sub>Si) 72.6 (1C, s, OCH<sub>2</sub>), 69.2 (1C, s, OCH<sub>2</sub>), 68.3

(1C, s, OCH<sub>2</sub>), 55.3 (4C, s, N(CH<sub>3</sub>)<sub>4</sub>), 54.7 (2C, s, C<sub>c</sub>-H), 46.4 (2C, s, C<sub>c</sub>-H), 38.7 (1C, s, CH<sub>2</sub>SH); δ<sub>B</sub>(96 MHz; CD<sub>3</sub>COCD<sub>3</sub>; BF<sub>3</sub>·OEt<sub>2</sub>) 22.8 (1B, s, B(8)), 3.7 (1B, d, *J* 135), 0.5 (1B, d, *J* 143), -2.4 (1B, d, *J* 147), -4.1 (2B, d, *J* 159), -7.5 (2B, d, *J* 89), -8.2 (4B, d, *J* 121), -17.2 (2B, d, *J* 153), -20.4 (2B, d, *J* 149), -21.8 (1B, d), -28.4 (1B, d, *J* 149); *m/z* (MALDI-TOF-MS) 458.7 (M+CH<sub>2</sub>, 6.6%), 444.7 (M, 27.5), 410.6 (M-SH, 10.1), 382.6 (M-C<sub>2</sub>H<sub>4</sub>SH, 19.8), 366.5 (M-OC<sub>2</sub>H<sub>4</sub>SH, 15.3), 337.5 (M-OC<sub>4</sub>H<sub>8</sub>SH, 18.1), 324.5 (M-O<sub>2</sub>C<sub>4</sub>H<sub>8</sub>SH, 2.5).

**Synthesis of [N(CH<sub>3</sub>)<sub>4</sub>][3,3'-Co(8-OCH<sub>2</sub>CH<sub>2</sub>OH-1,2-C<sub>2</sub>B<sub>9</sub>H<sub>10</sub>)(1',2'-C<sub>2</sub>B<sub>9</sub>H<sub>11</sub>)], [N(CH<sub>3</sub>)<sub>4</sub>][10].** To a 25 mL round-bottom flask were added Mg metal (45 mg, 1.85 mmol) and 2 mL of anhydrous THF. Then, a solution of [N(CH<sub>3</sub>)<sub>4</sub>][5] (50 mg, 0.09 mmol) in THF and dibromoethane (0.05 mL, 0.12 mmol) were added dropwise, at the same time, to the Mg suspension. Once the addition was completed the reaction mixture was left refluxing. When it returns to room temperature, water is added to destroy the excess of magnesium. The solution is evaporated. The resulting residue is dissolved in Et<sub>2</sub>O and extracted 3x HCl (1M). The product was redissolved in the minimum volume of ethanol and an aqueous solution containing an excess of [N(CH<sub>3</sub>)<sub>4</sub>]Cl was added, resulting in the formation of an orange precipitate. This was filtered off, washed with water and petroleum ether, and dried in vacuo. The desired compound was obtained as N(CH<sub>3</sub>)<sub>4</sub>[10] (0.03 g, 76%). (Found: C, 26.2; H, 8.3; N, 3.1%. Calcd for C<sub>10</sub>H<sub>38</sub>B<sub>18</sub>CoNO<sub>2</sub>: C, 26.2; H, 8.4; N, 3.1%); μ<sub>max</sub>/cm<sup>-1</sup> 3524 (O-H), 3038 (C-H)<sub>c</sub>, 2956, 2925 and 2857 (C-H)<sub>aryl/alkyl</sub>, 2556 (B-H), 1482 δ(CH<sub>3</sub>), 1167 δ(CH) and 946 (C-N); δ<sub>H</sub>(300 MHz; CD<sub>3</sub>COCD<sub>3</sub>; (CH<sub>3</sub>)<sub>4</sub>Si) 4.18 (4H, br s, C<sub>c</sub>-H), 3.55 (4H, m, OCH<sub>2</sub>CH<sub>2</sub>), 3.44 (12H, s, N(CH<sub>3</sub>)<sub>4</sub>), 2.94 (1H, br s, O-H), 2.88-1.44 (17H, m, B-H); δ<sub>H(B)}</sub>(300 MHz; CD<sub>3</sub>COCD<sub>3</sub>; (CH<sub>3</sub>)<sub>4</sub>Si) 4.18 (4H, br s, C<sub>c</sub>-H), 3.55 (4H, m, OCH<sub>2</sub>CH<sub>2</sub>), 3.44 (12H, s, N(CH<sub>3</sub>)<sub>4</sub>), 2.94 (1H, br s, O-H), 2.88 (3H, s, B-H), 2.71 (2H, s, B-H), 2.69 (1H, s, B-H), 2.67 (1H, s, B-H), 2.00 (2H, s, B-H), 1.78 (2H, s, B-H), 1.68 (1H, s, B-H), 1.61 (2H, s, B-H), 1.54 (2H, s, B-H), 1.44 (1H, s, B-H); δ<sub>C</sub>(75 MHz; CD<sub>3</sub>COCD<sub>3</sub>; (CH<sub>3</sub>)<sub>4</sub>Si) 70.36 (1C, s, OCH<sub>2</sub>), 62.66 (1C, s, CH<sub>2</sub>OH), 55.22 (4C, s, N(CH<sub>3</sub>)<sub>4</sub>), 53.67 (2C, s, C<sub>c</sub>-H), 46.36 (2C, s, C<sub>c</sub>-H); δ<sub>B</sub>(96 MHz; CD<sub>3</sub>COCD<sub>3</sub>; BF<sub>3</sub>·OEt<sub>2</sub>) 24.31 (1B, s, B(8)), 5.45 (1B, d, *J* 137), 1.07 (1B, d, *J* 142), -1.84 (1B, d, *J* 162), -3.69 (2B, d, *J* 164), -6.57 (2B, d, *J* 125), -7.30 (4B, d, *J* 123), -16.57 (2B, d, *J* 155), -19.57 (2B, d, *J* 159), -21.40 (1B, d, *J* 179), -27.94 (1B, d, *J* 166); *m/z* (MALDI-TOF-MS) 384.31 (M, 100%).

## Spectral Data

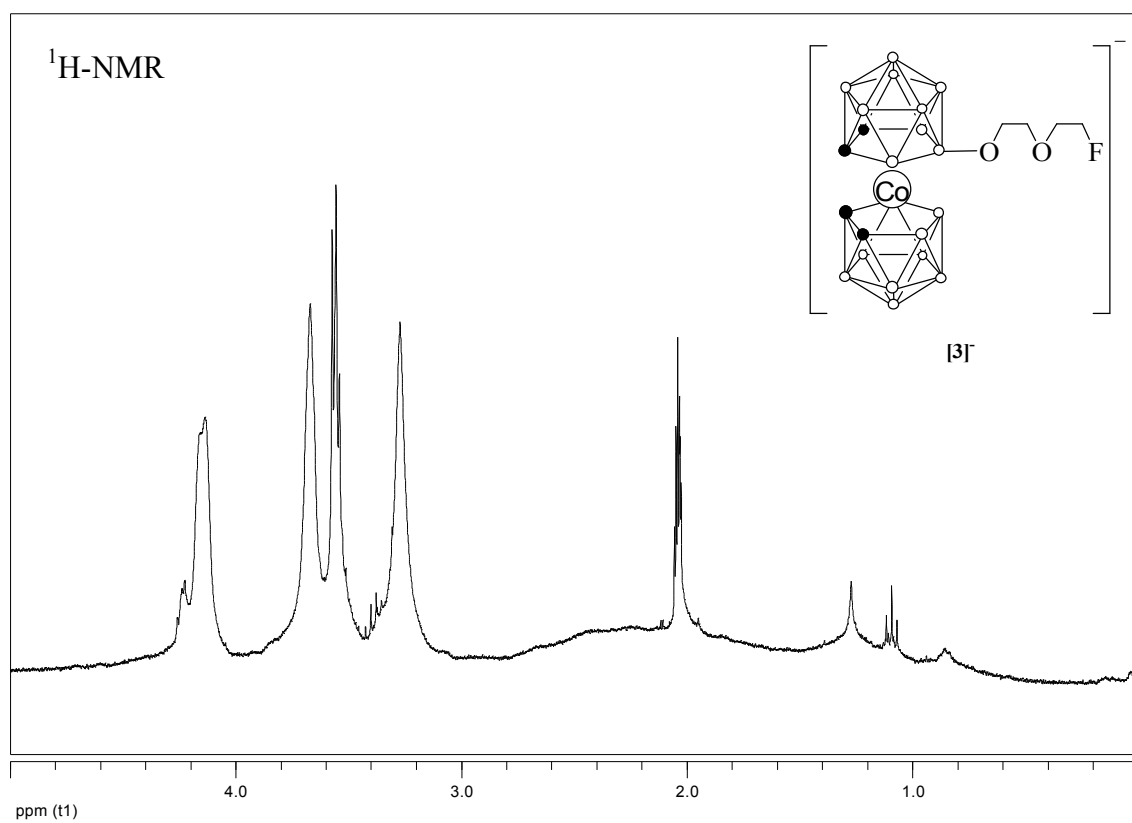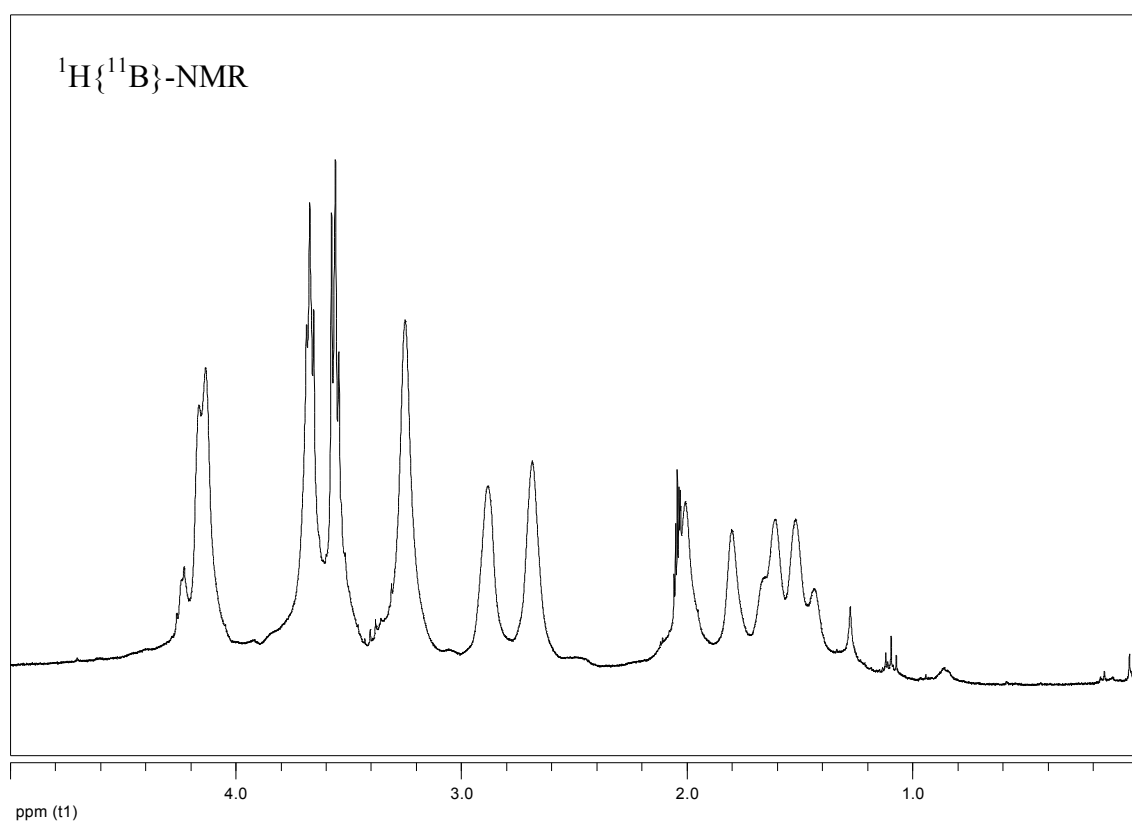



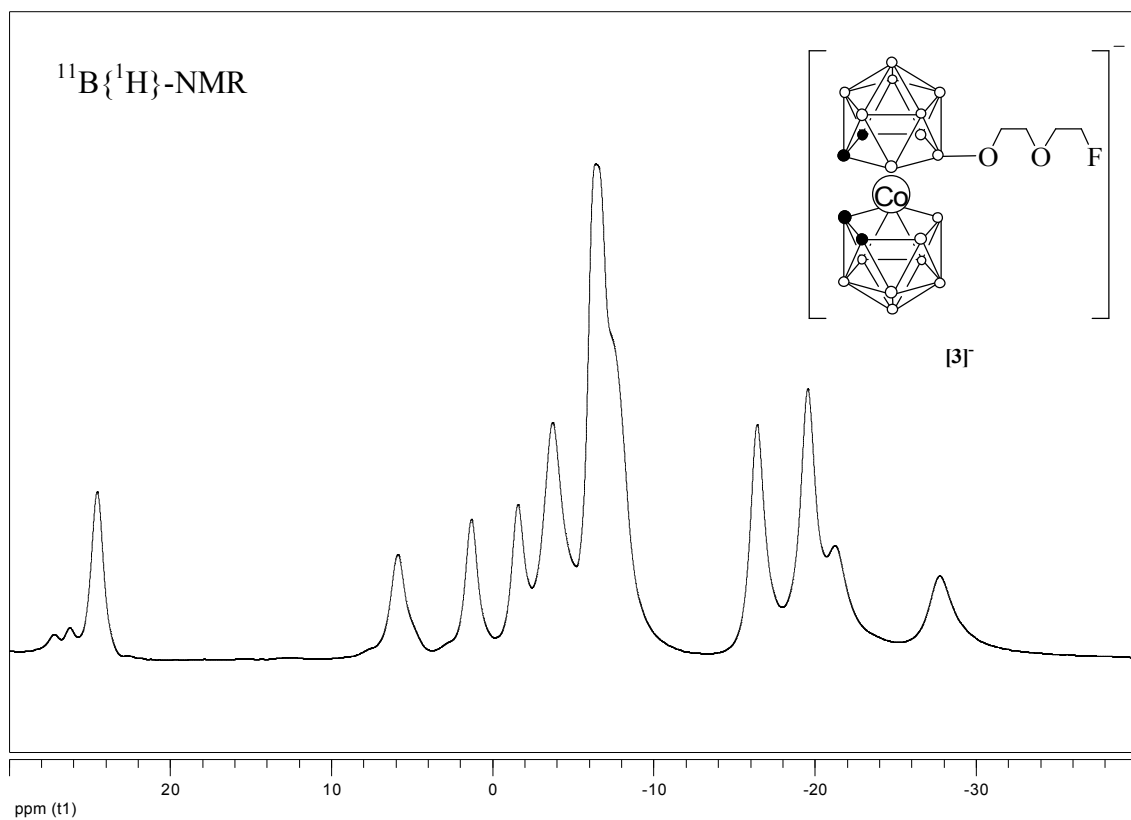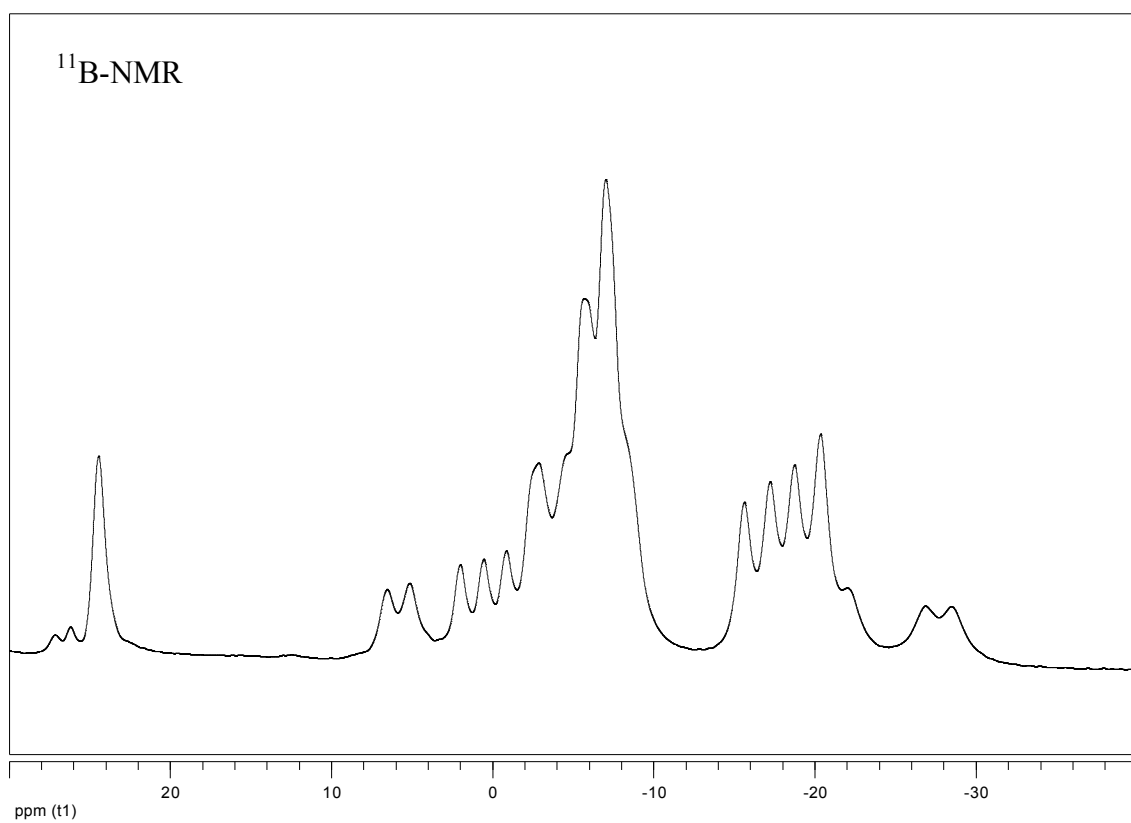

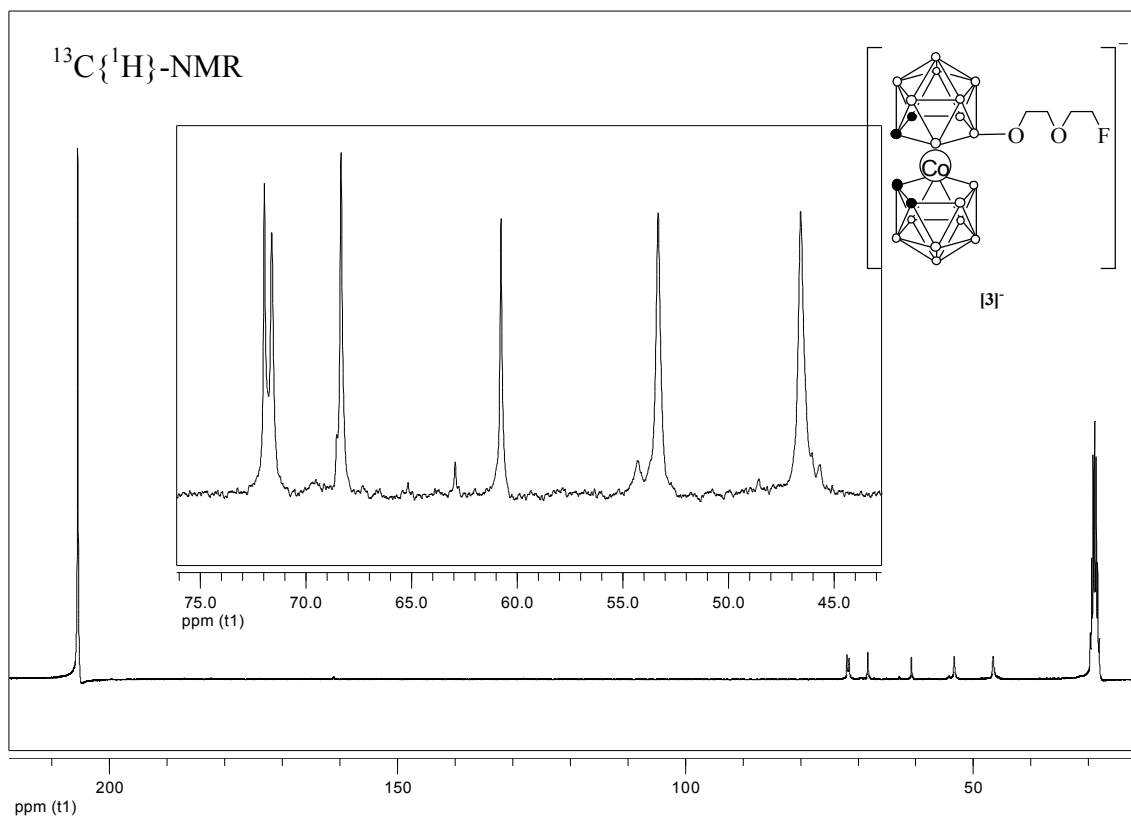

MALDI-TOF-MS

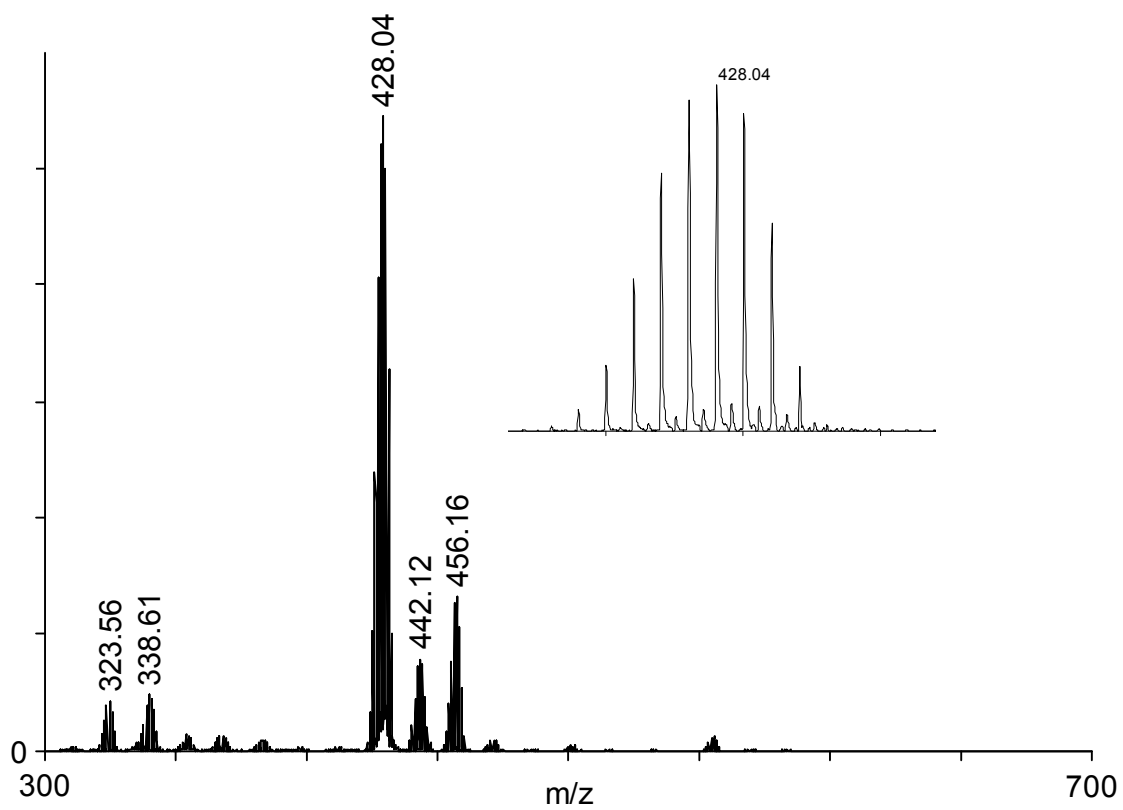

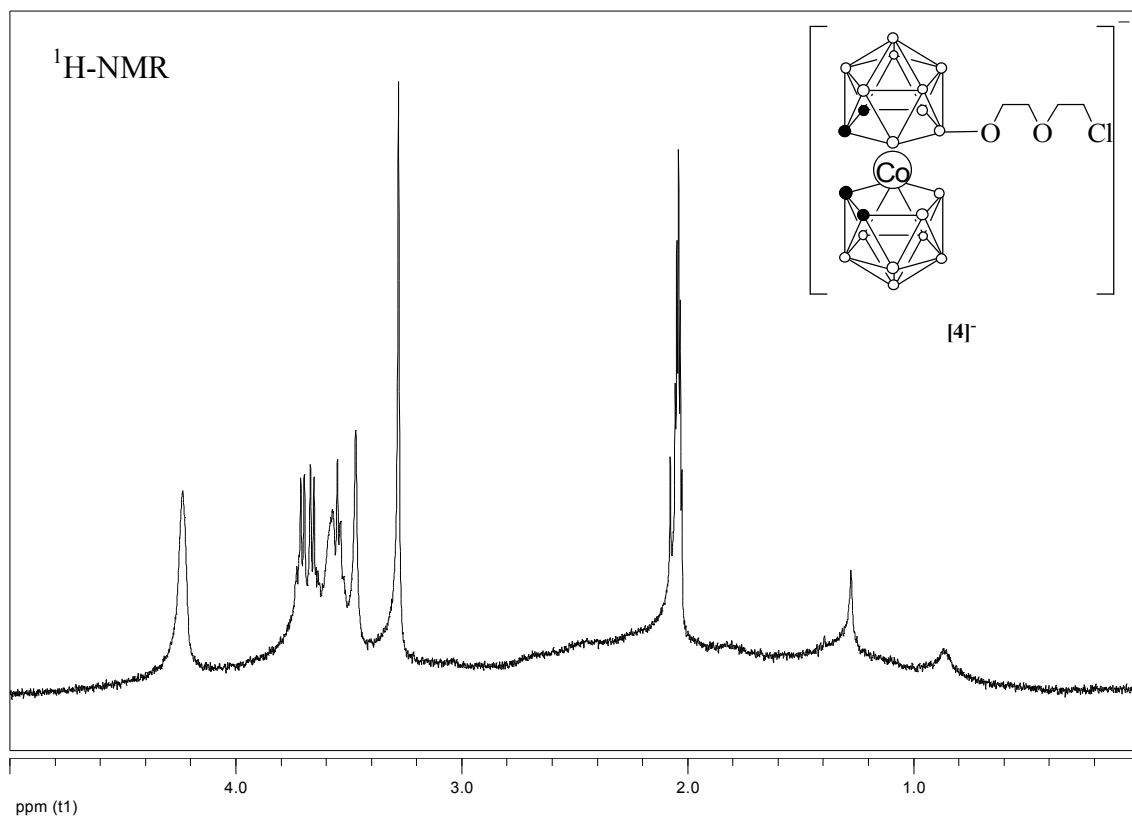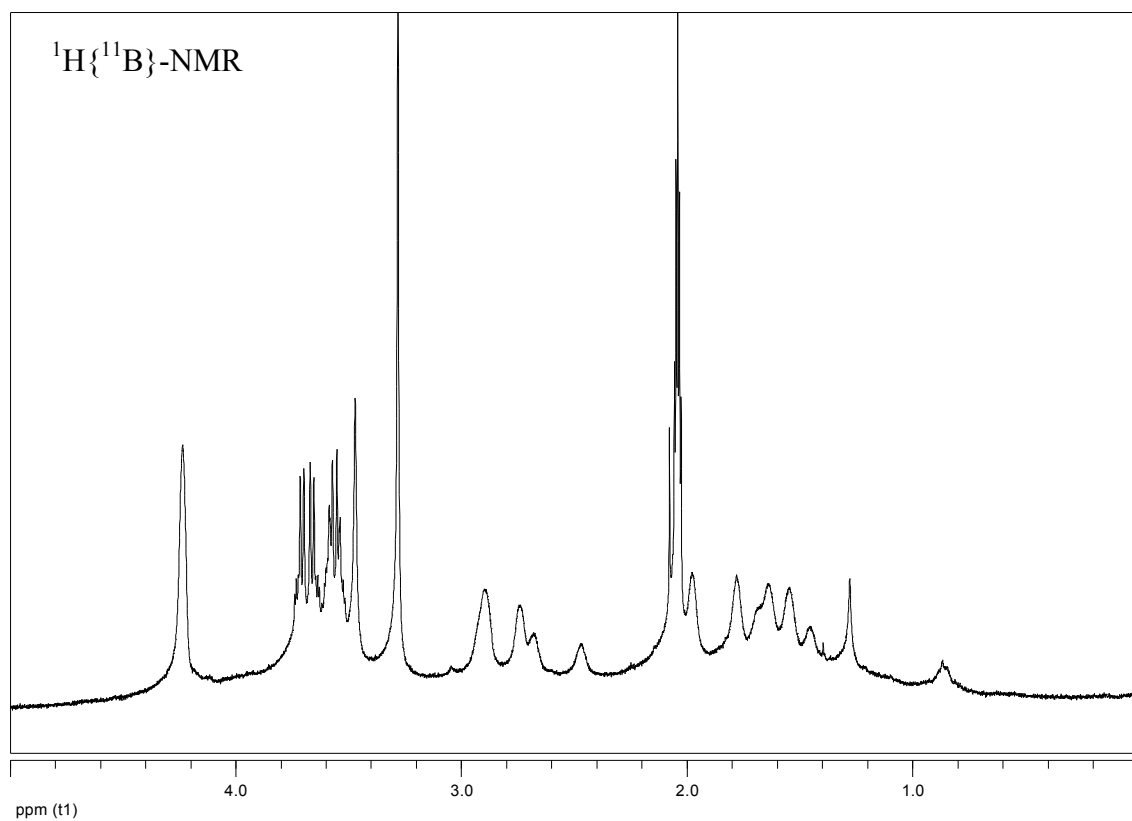

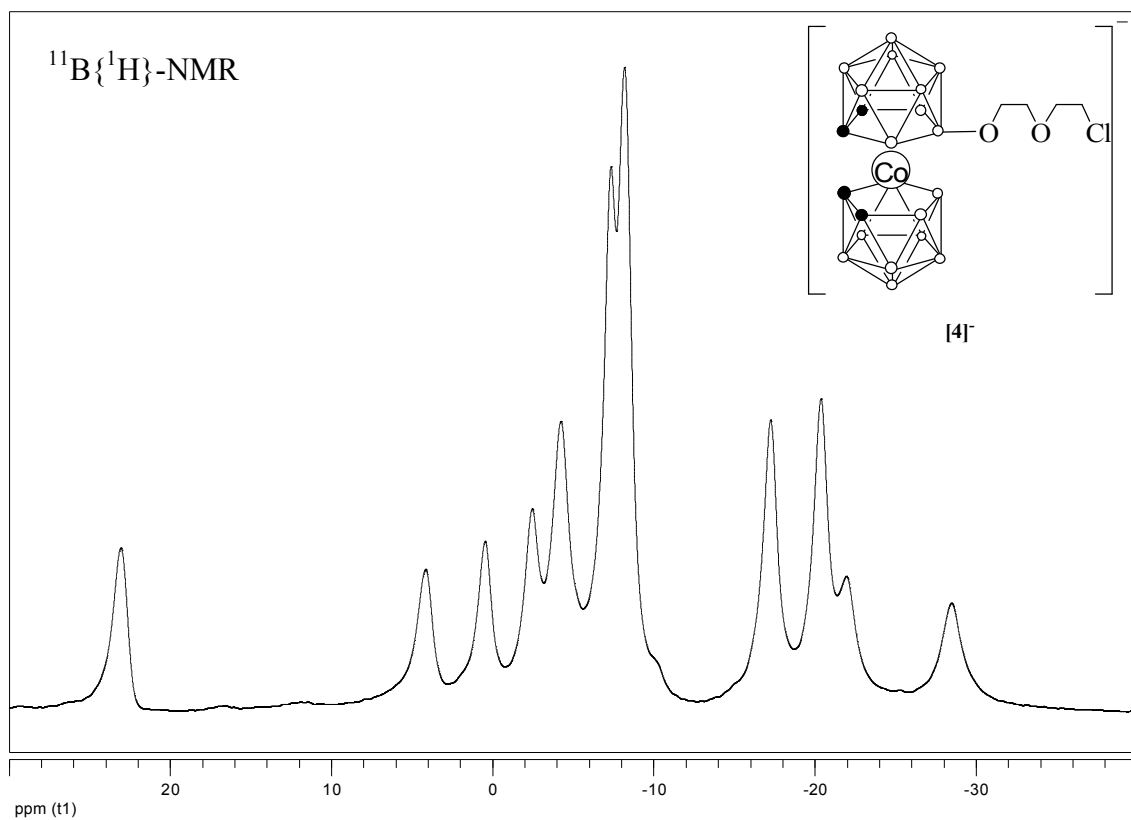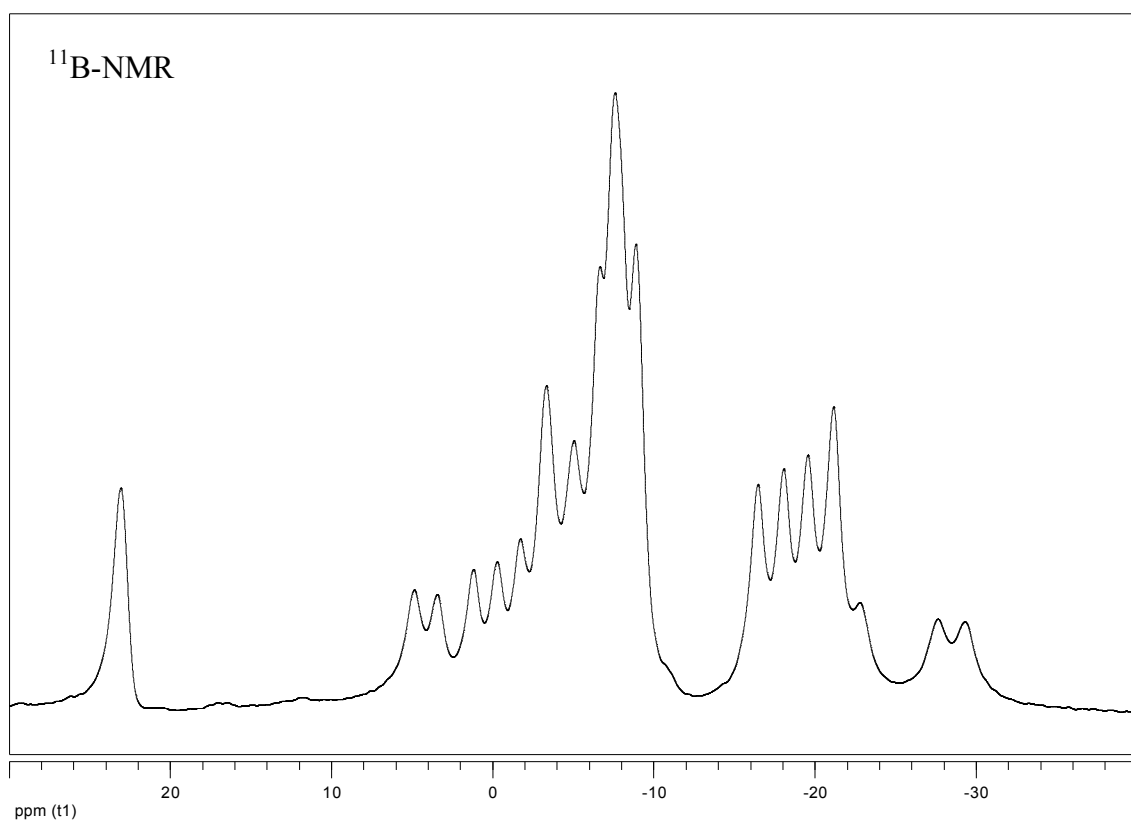

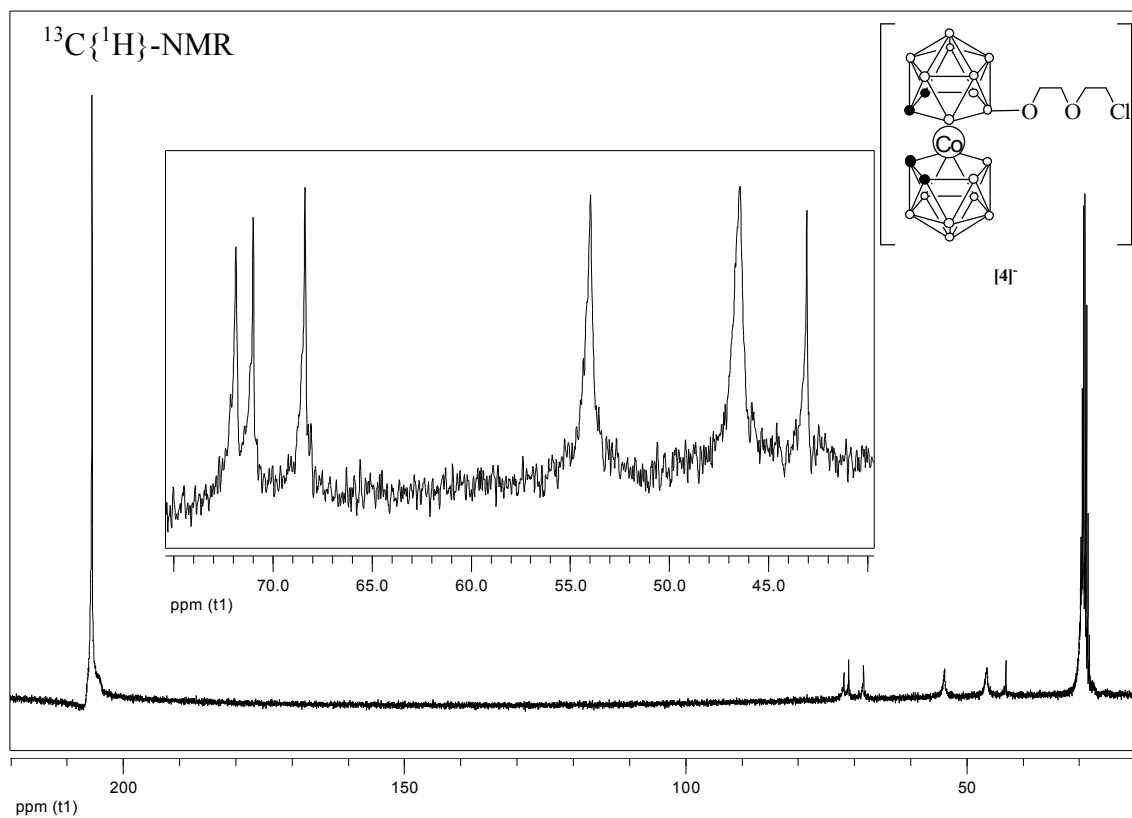

### MALDI-TOF-MS

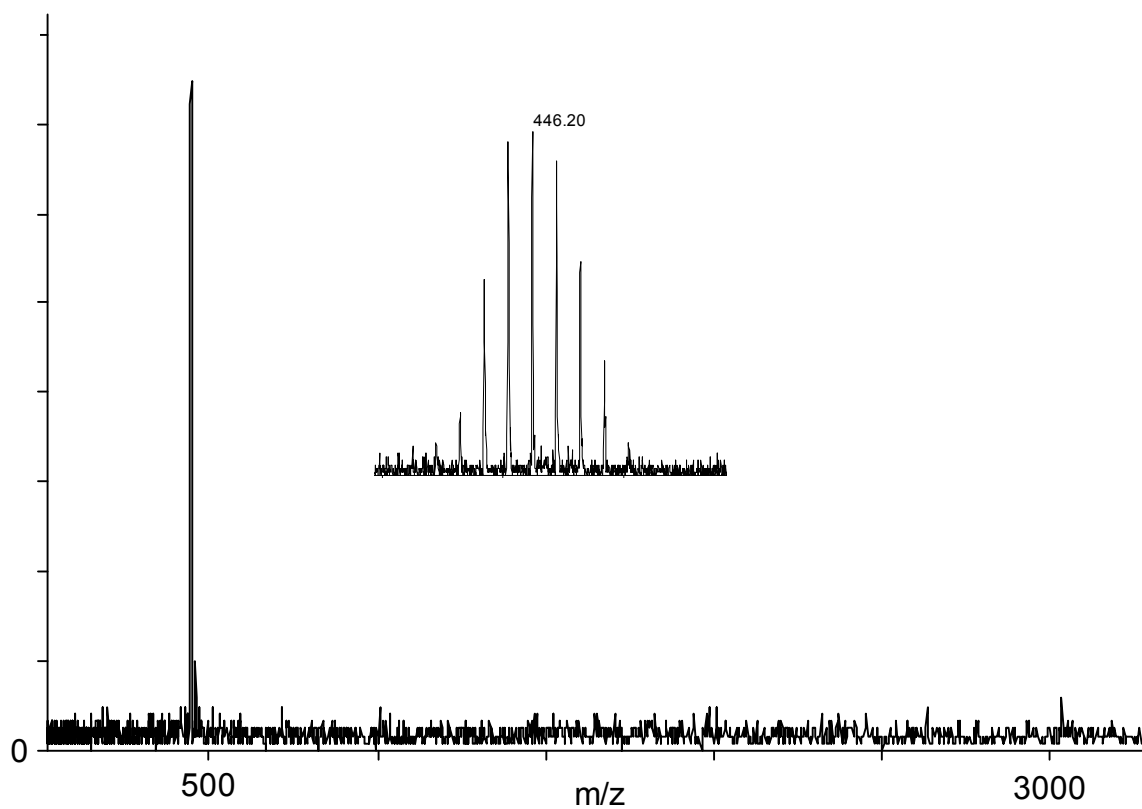

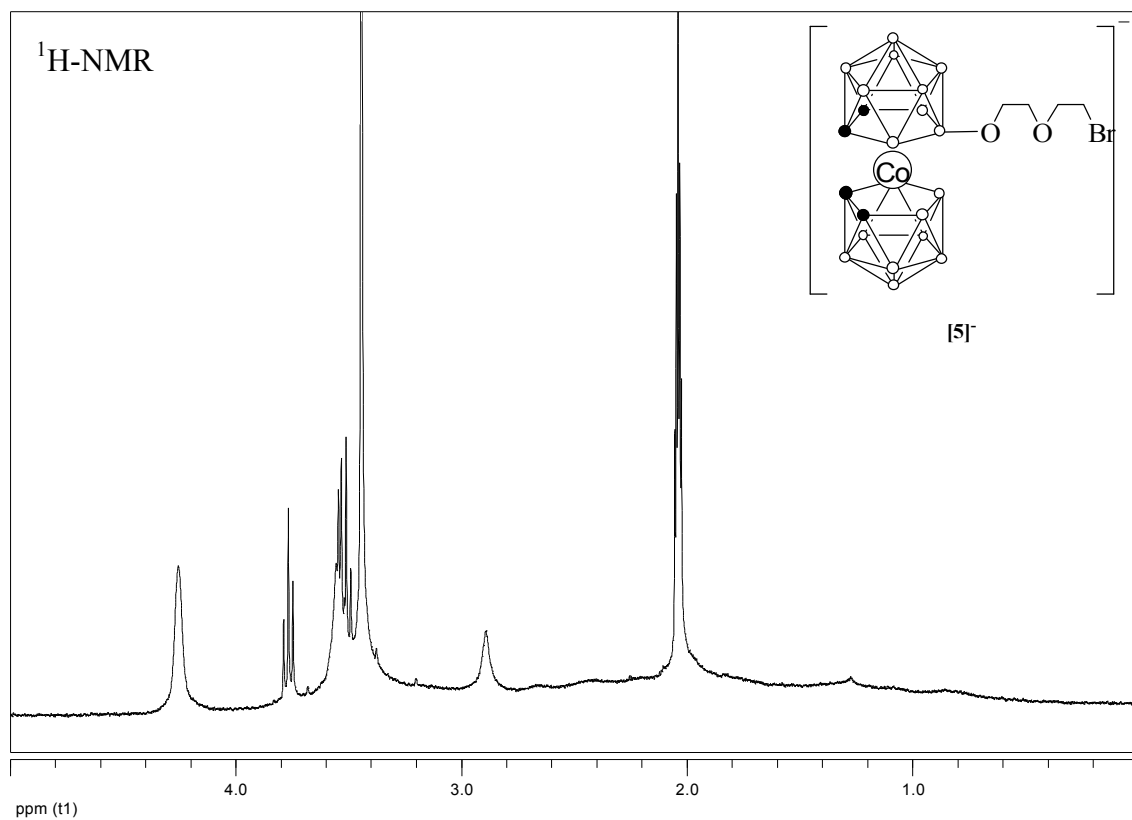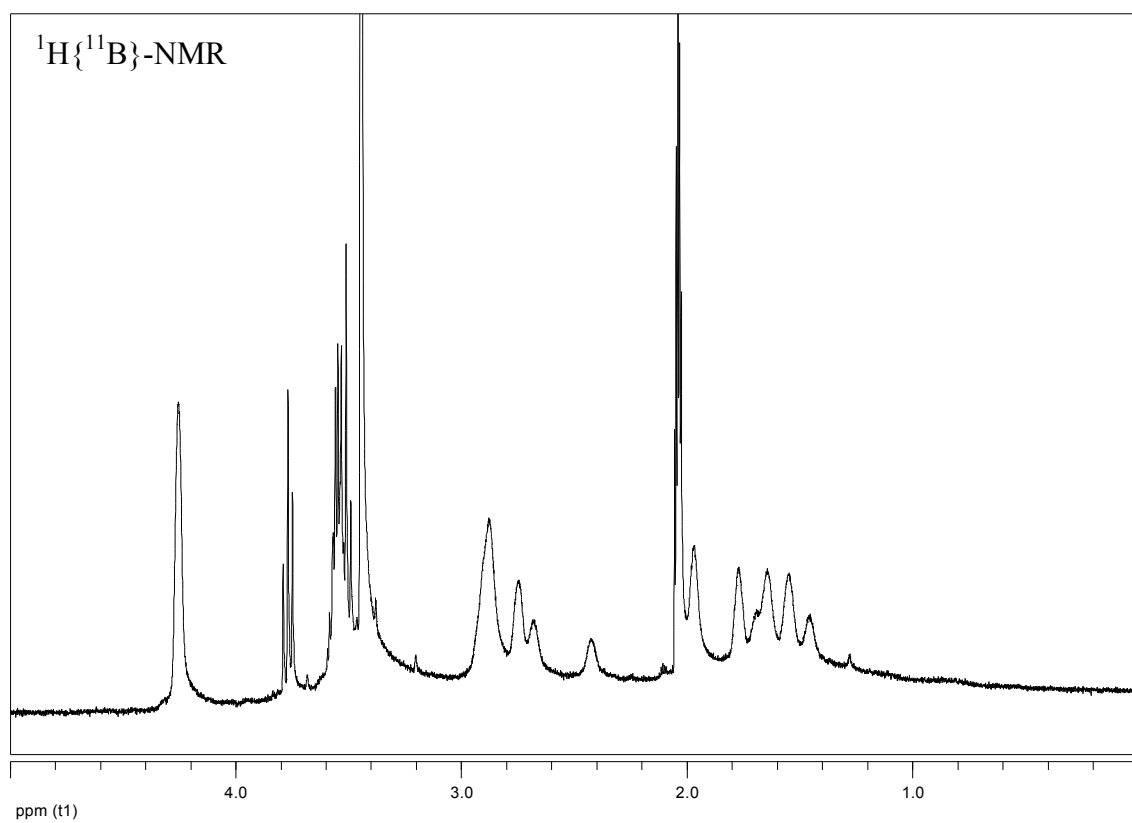

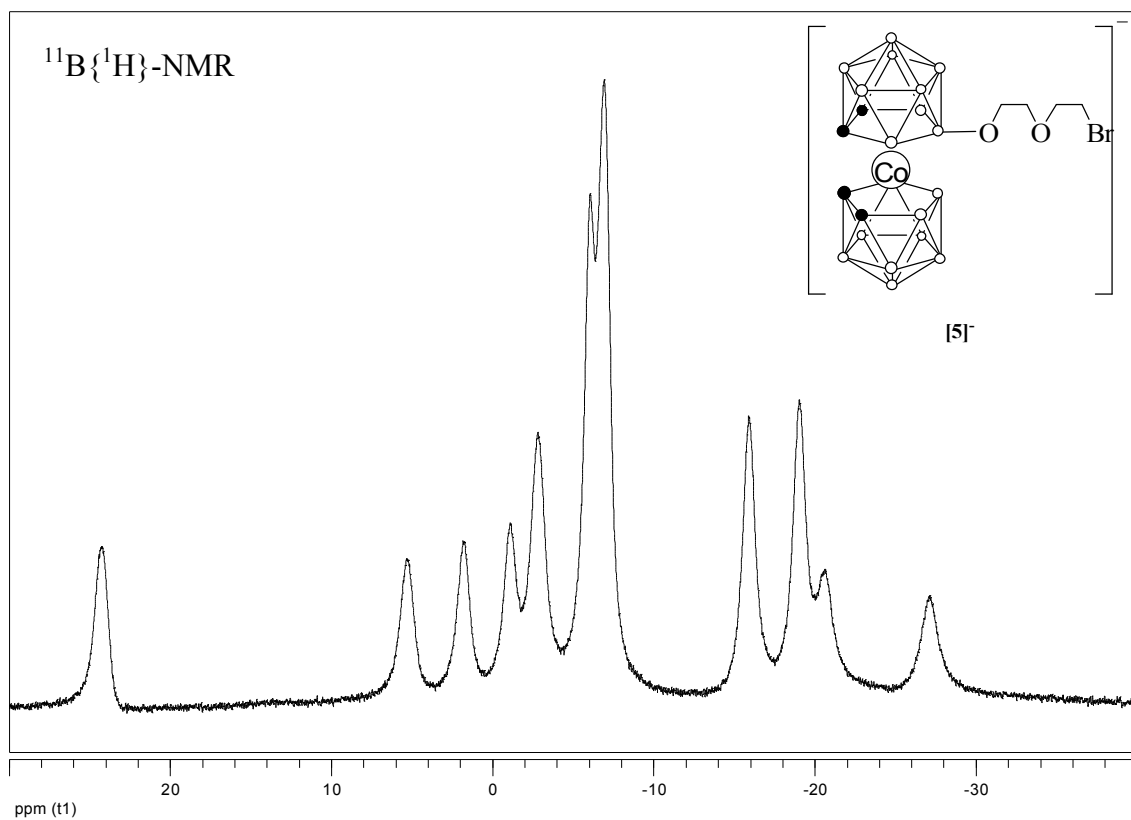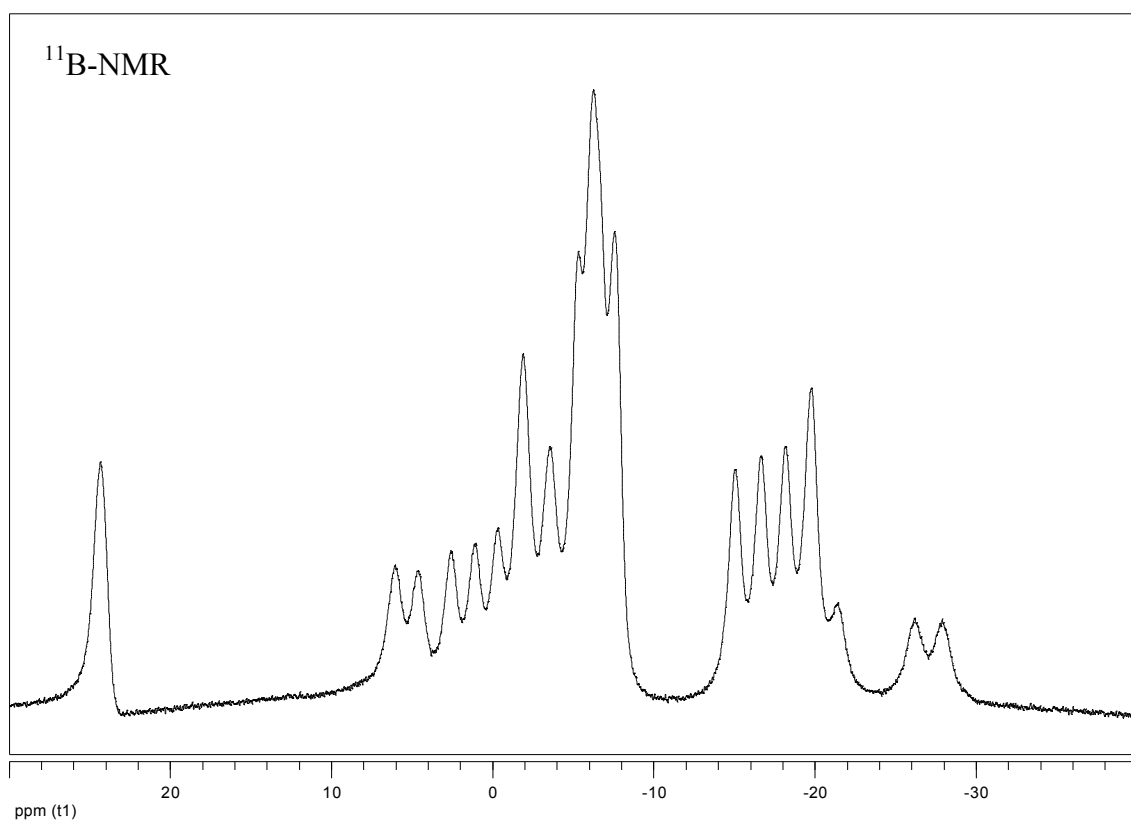





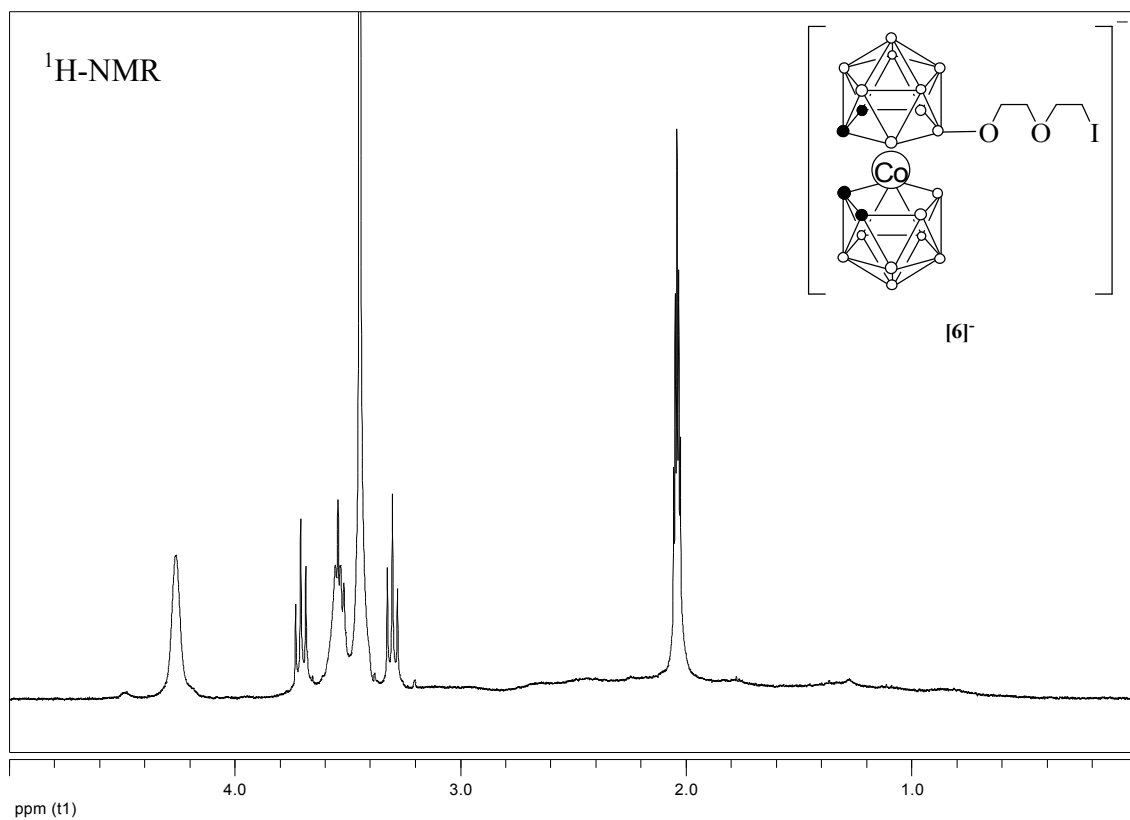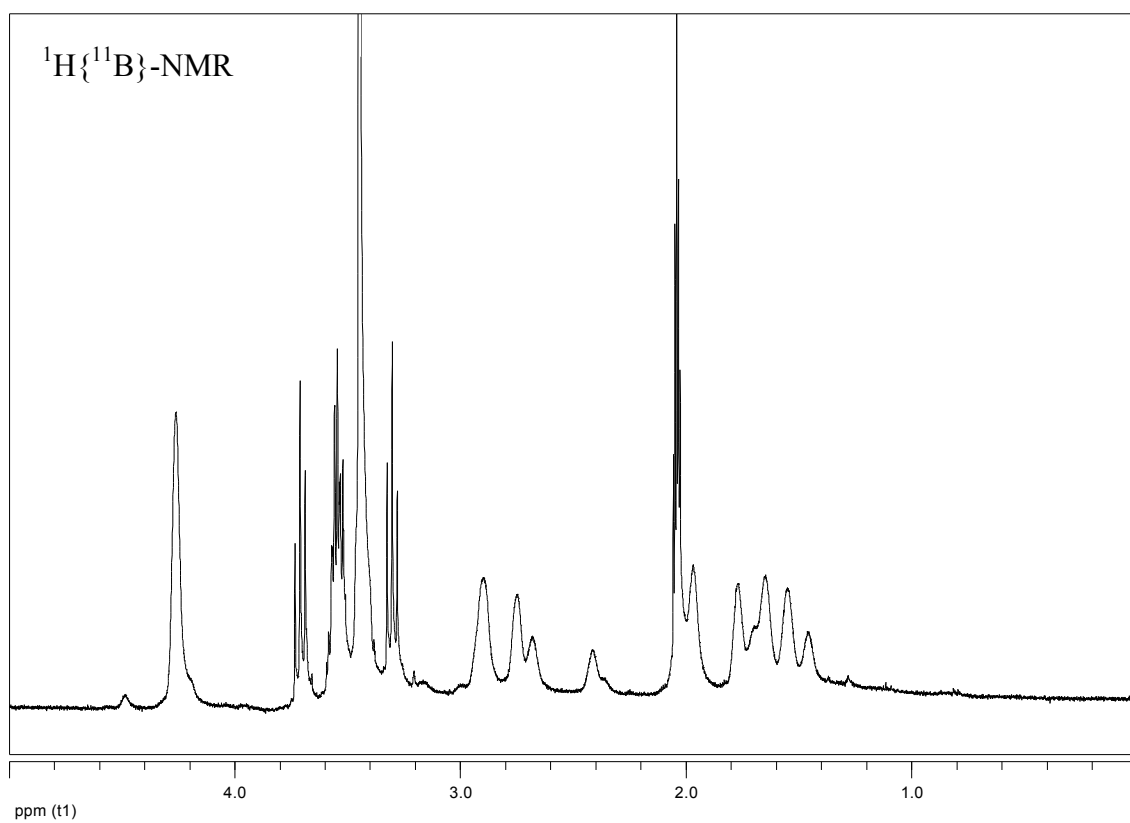

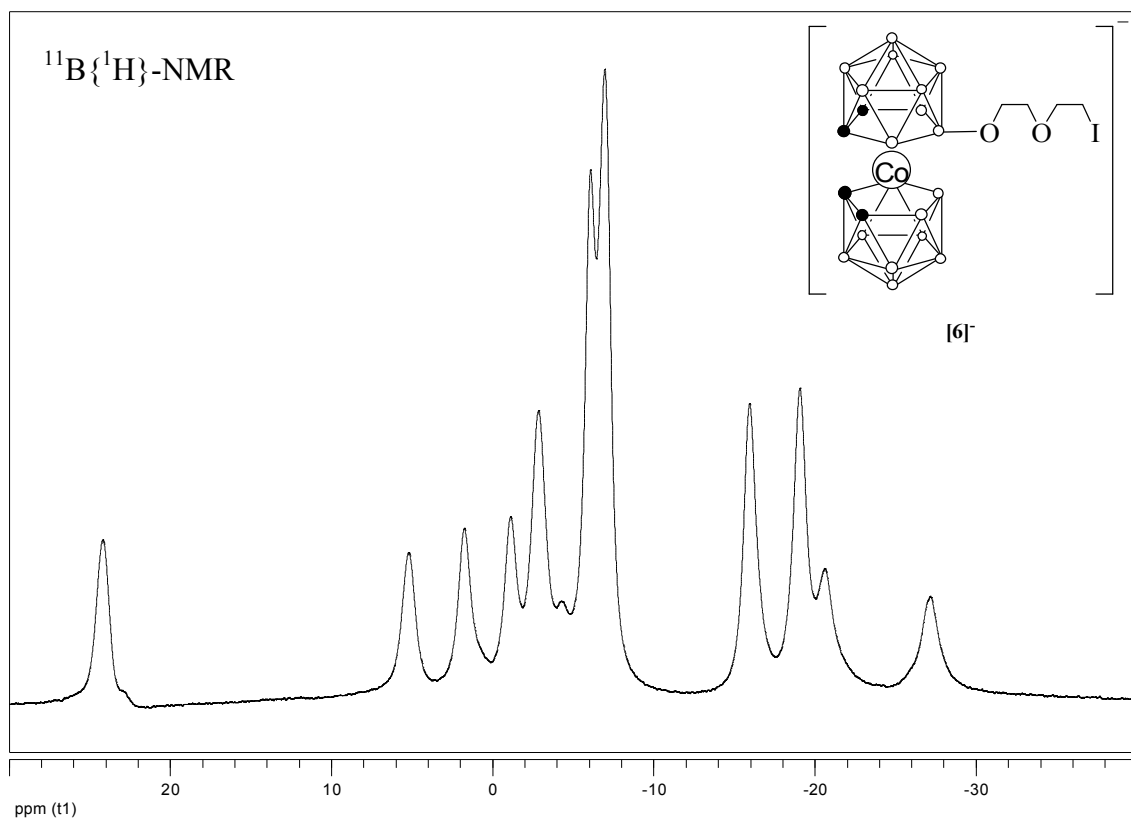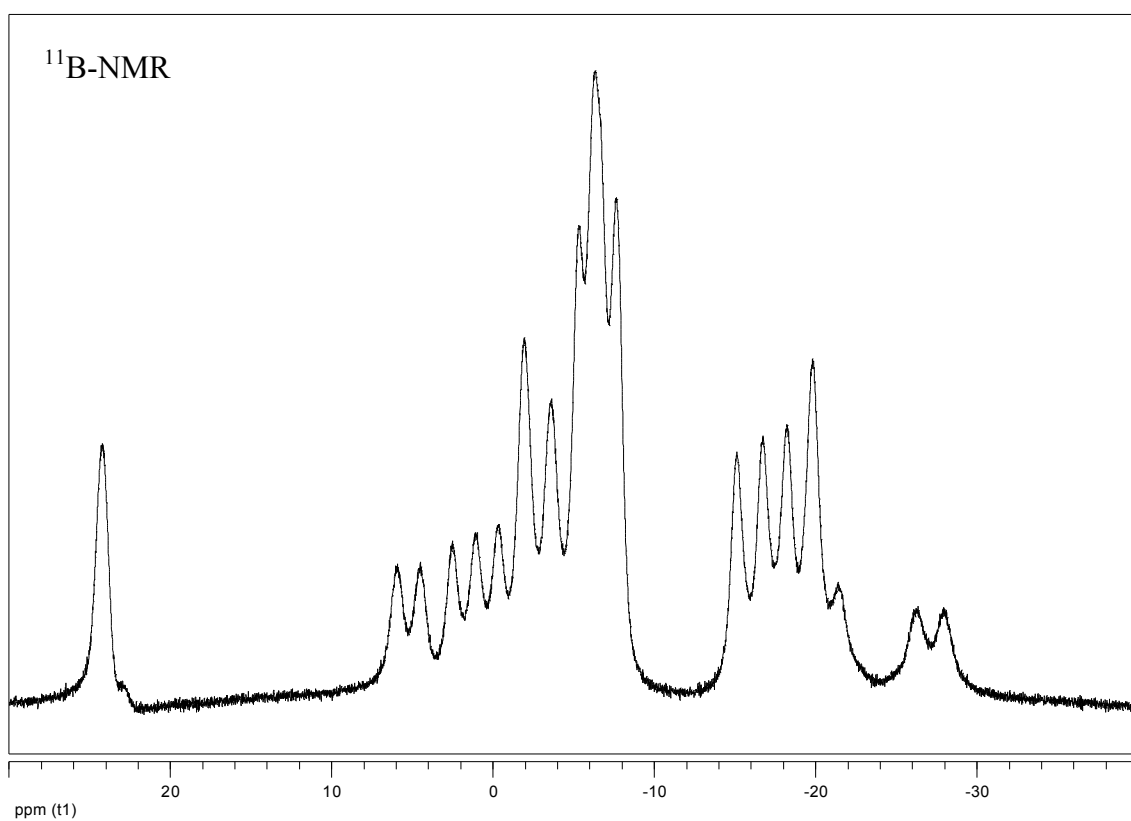

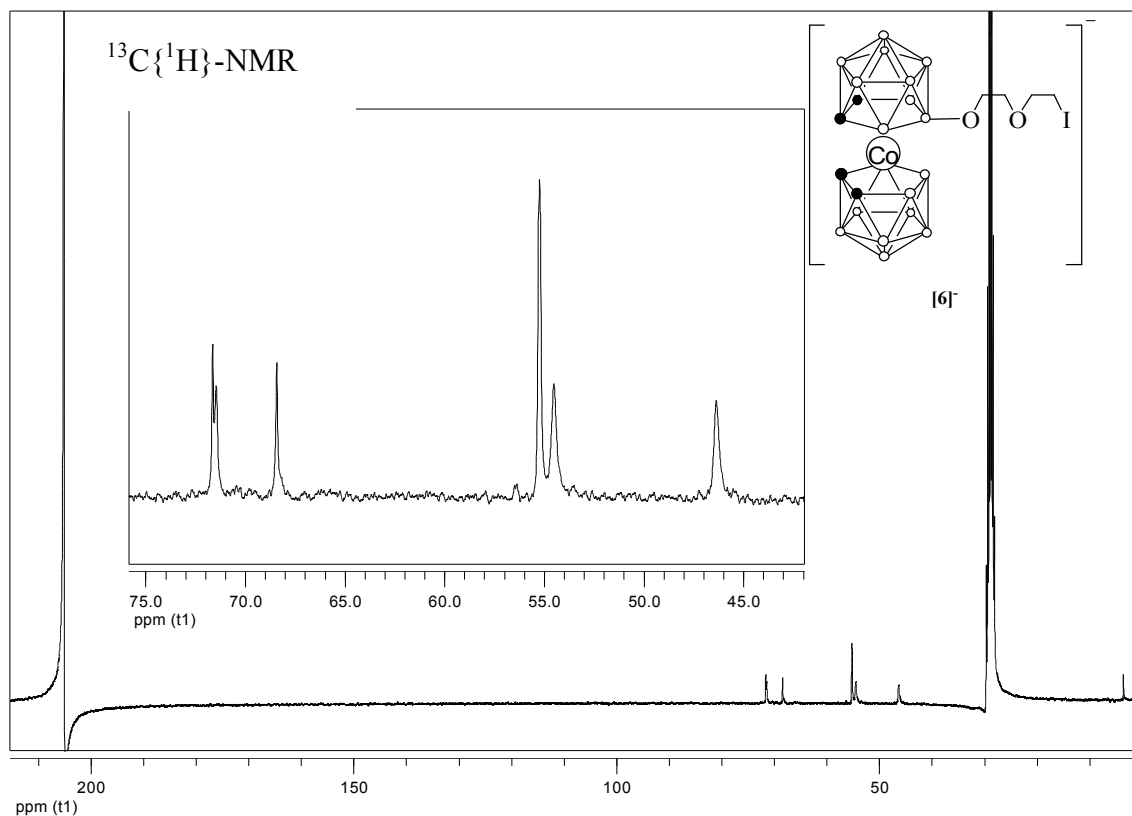

MALDI-TOF-MS

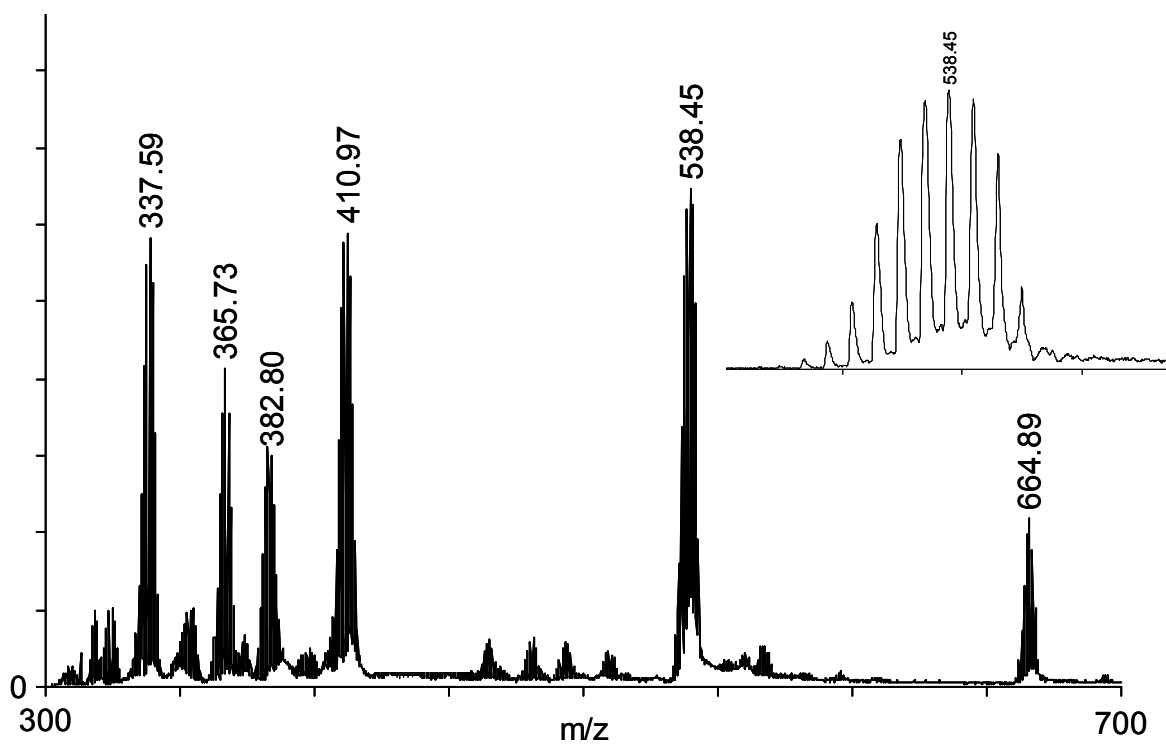

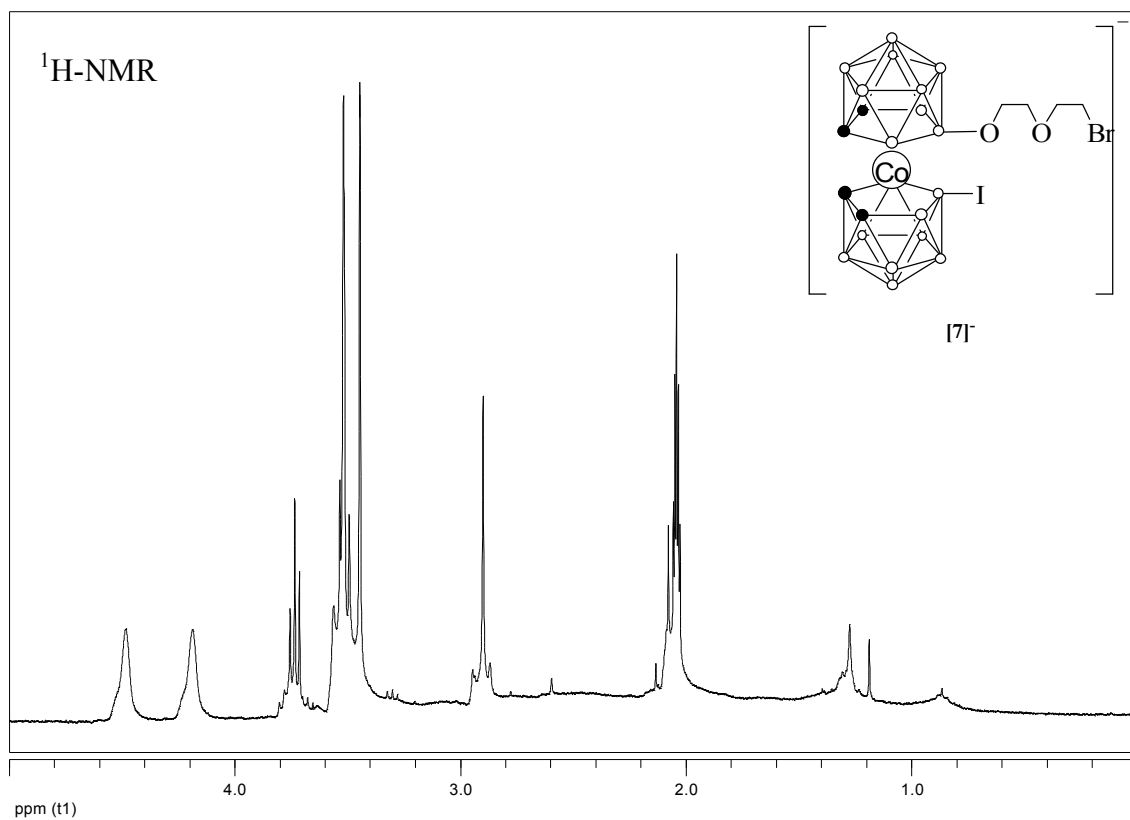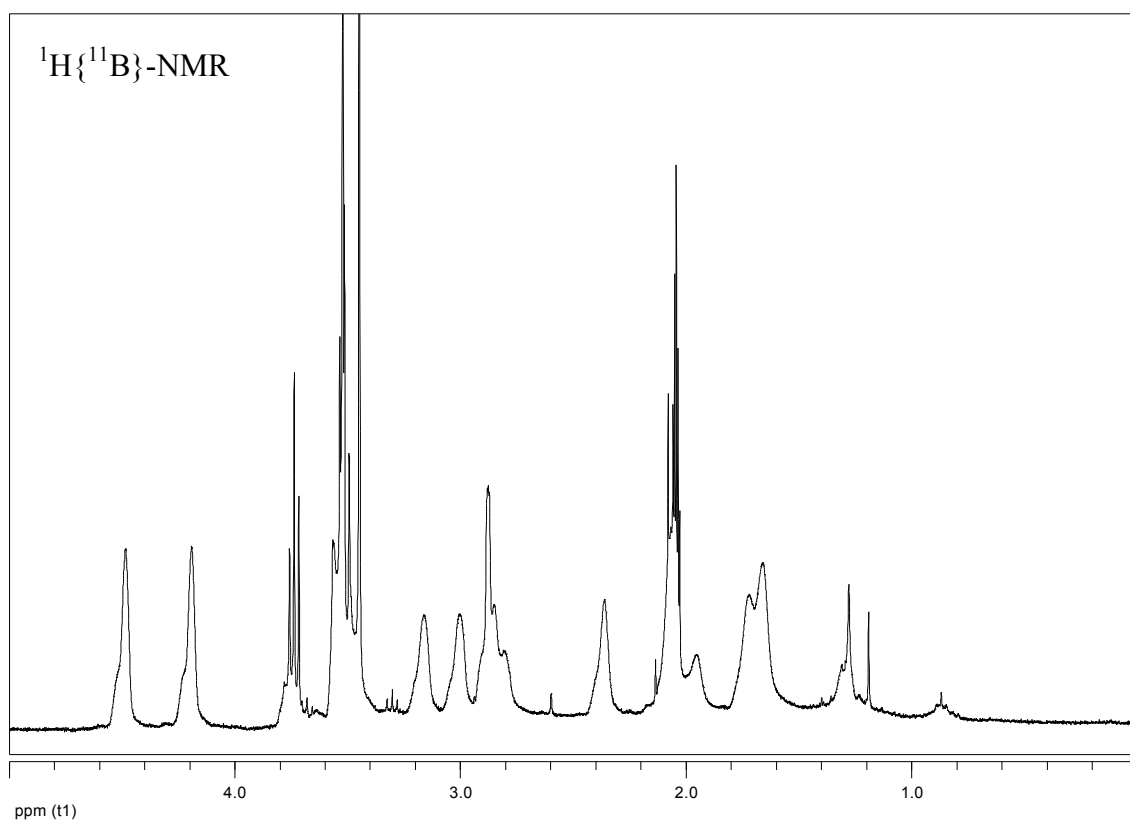

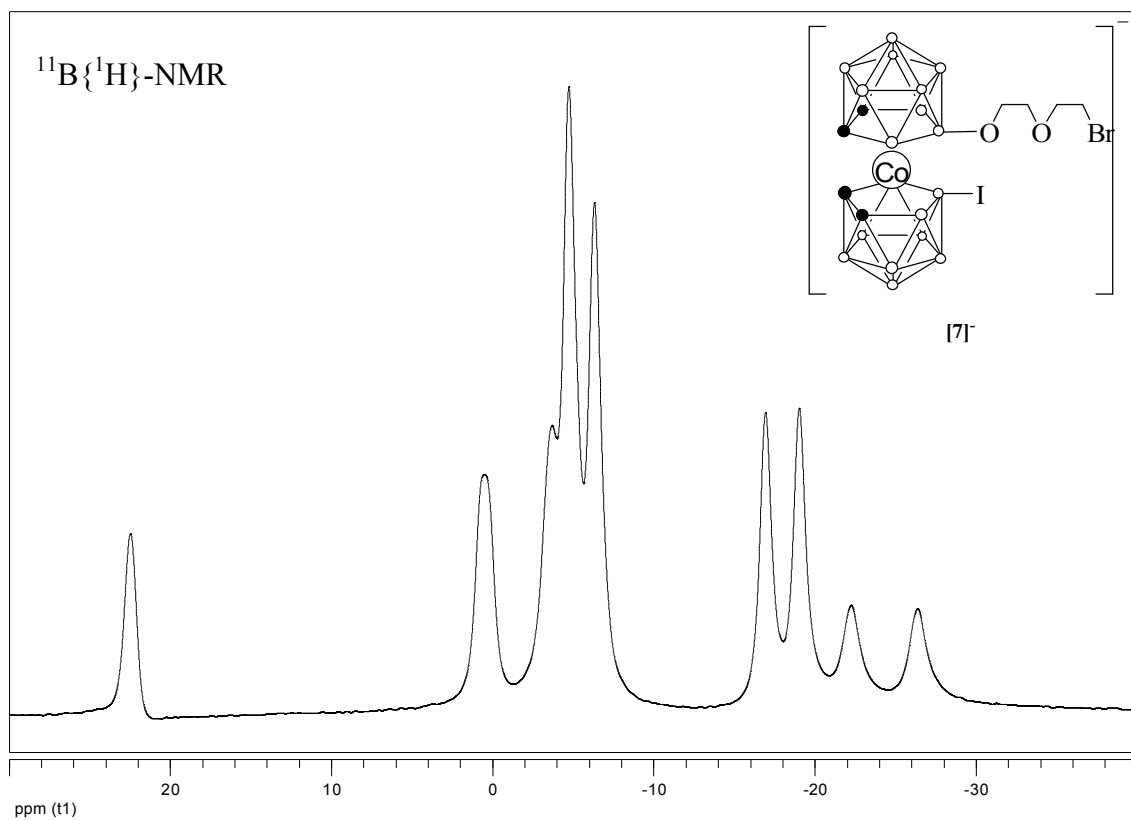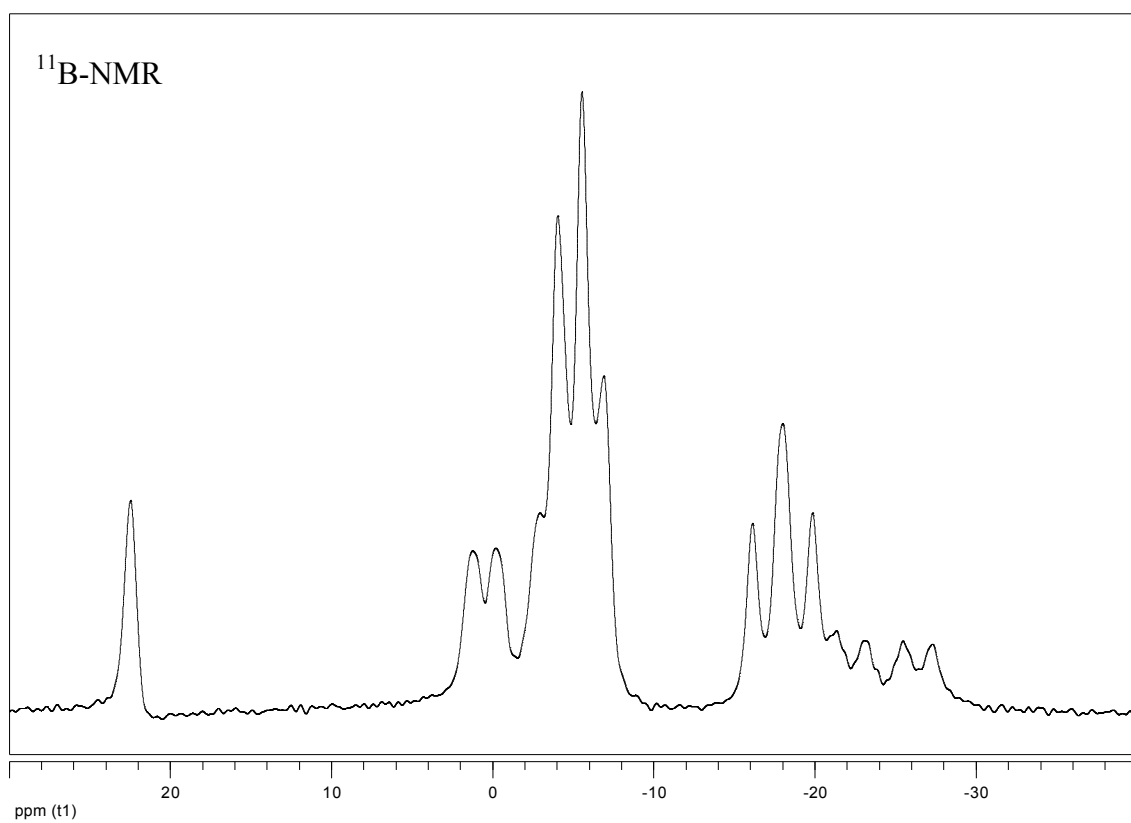

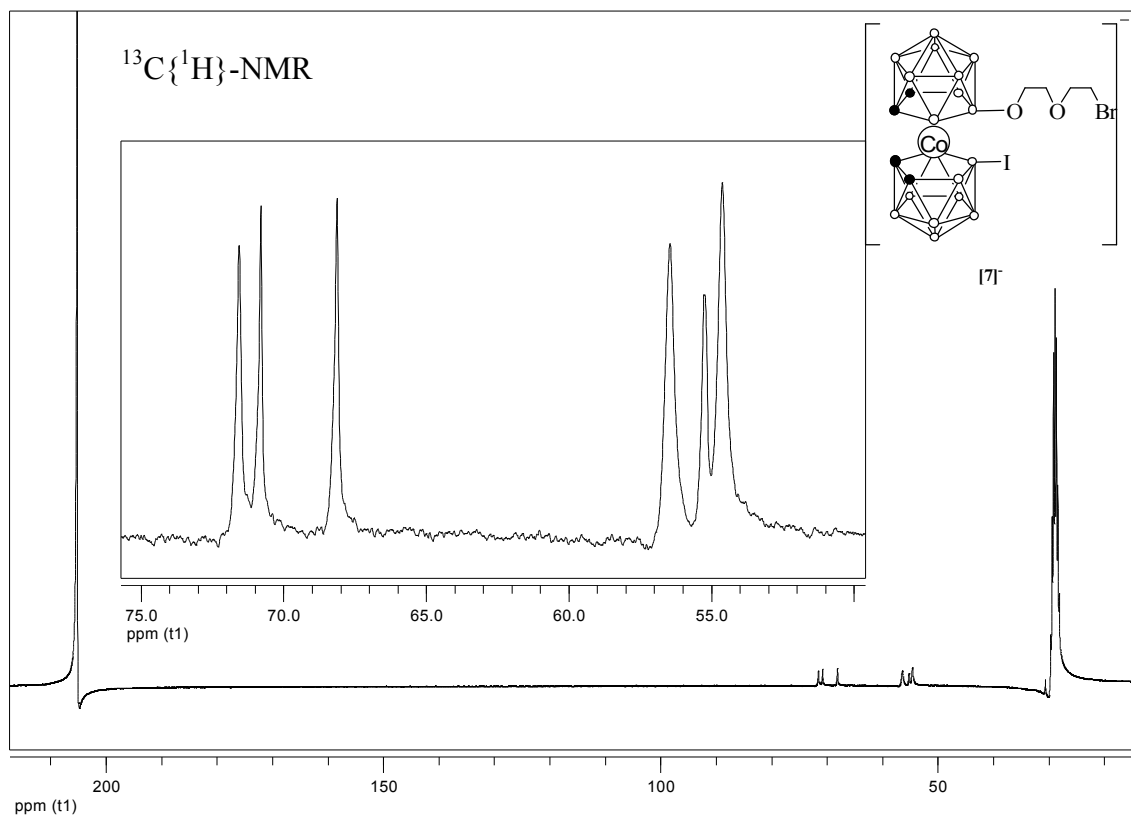

MALDI-TOF-MS

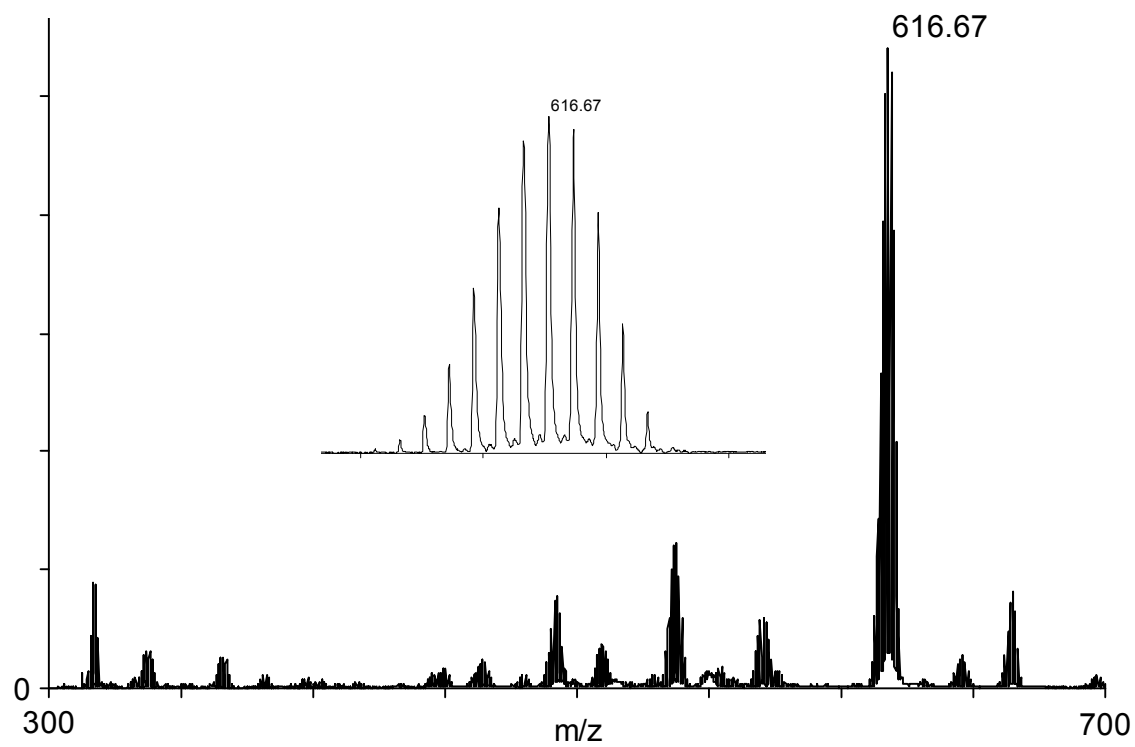

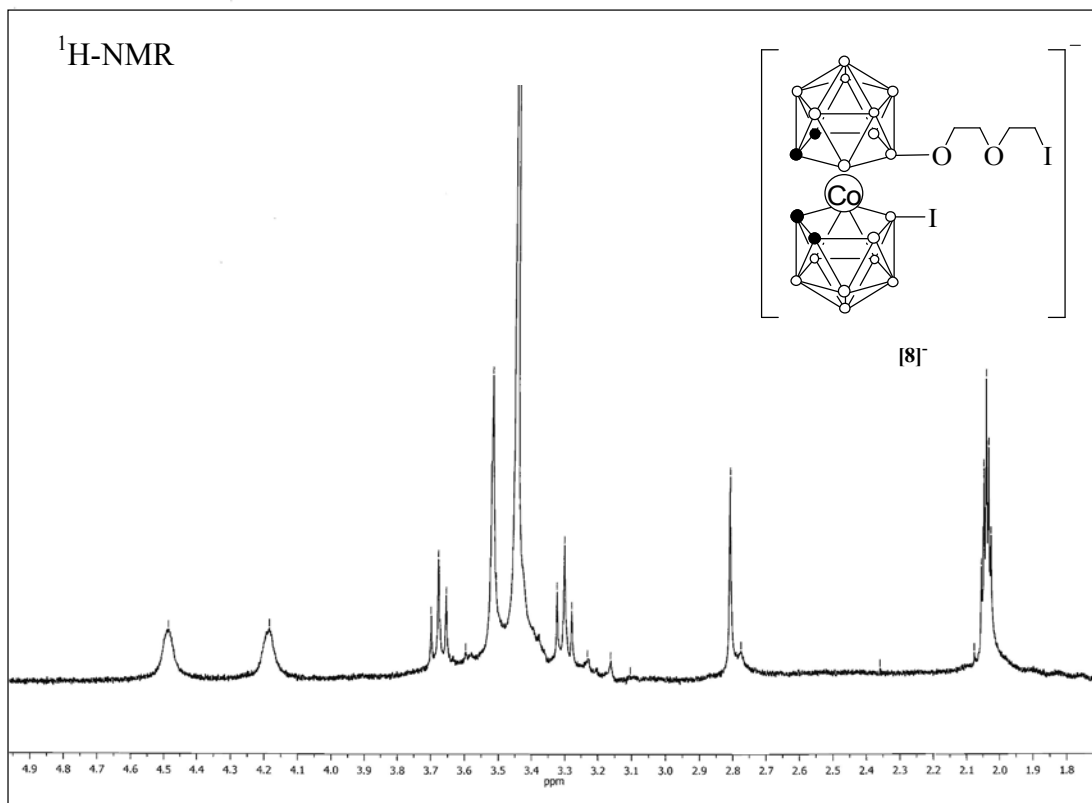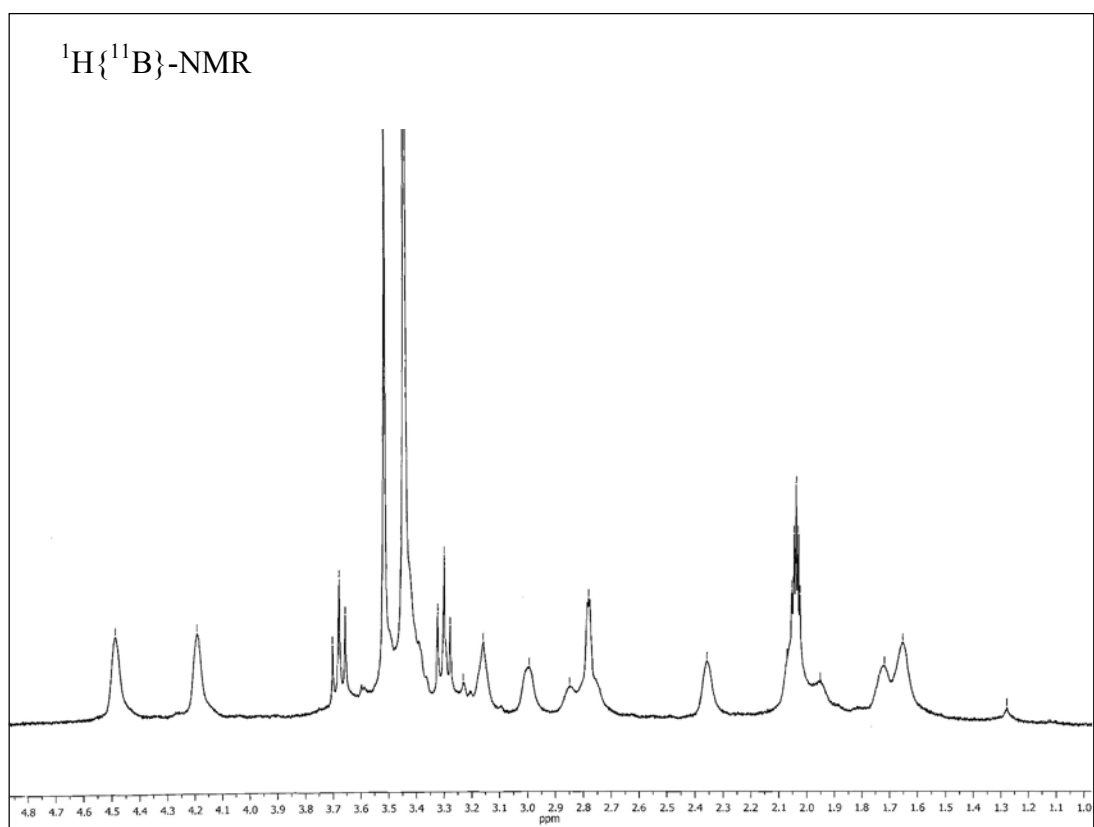

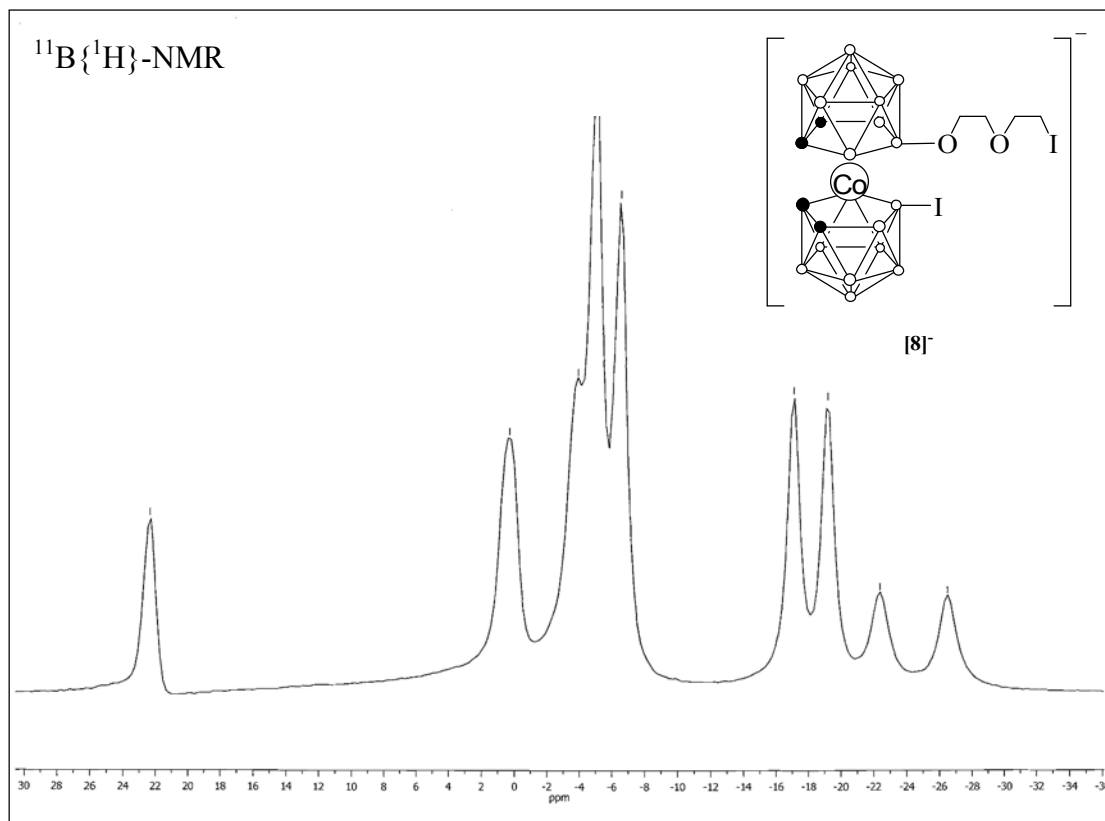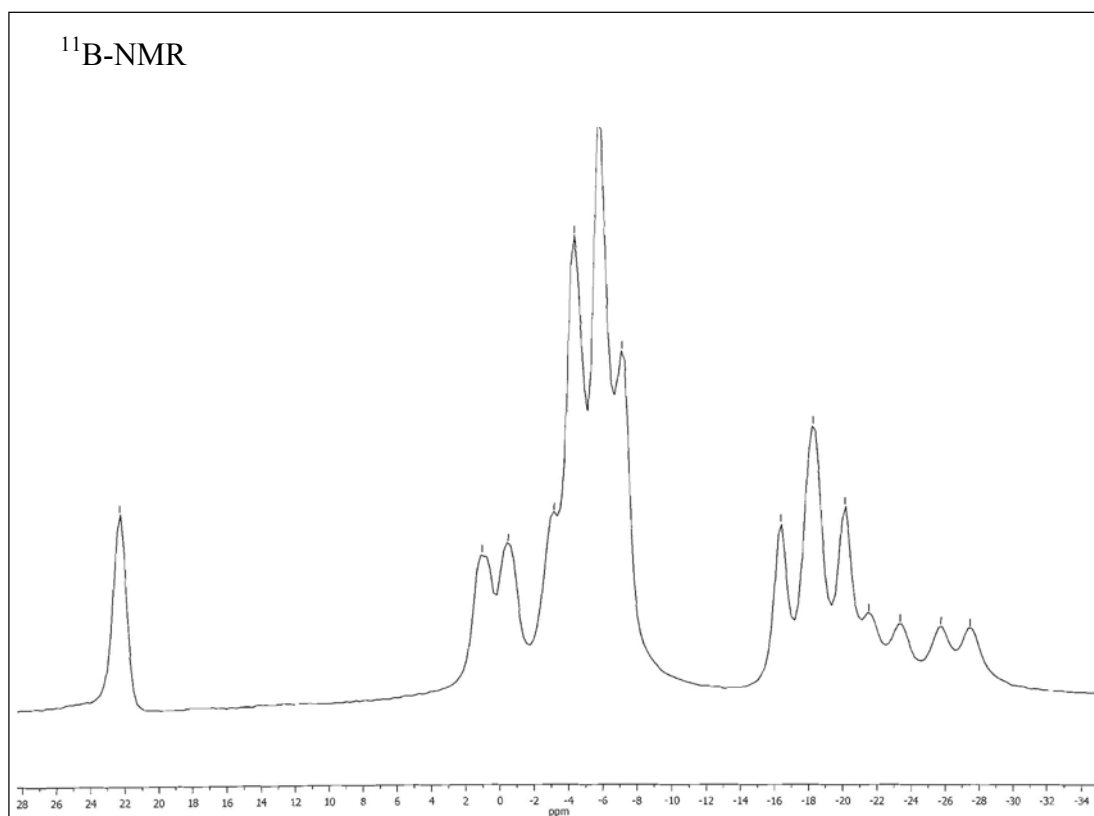



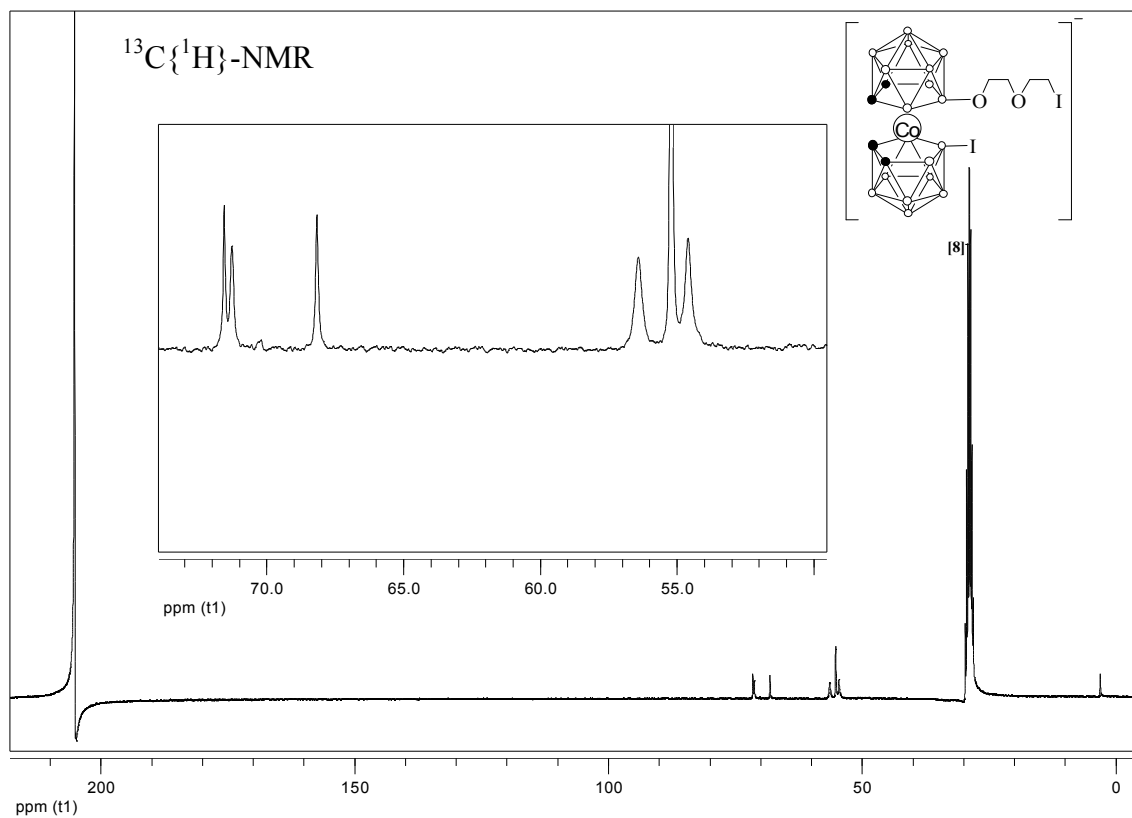

MALDI-TOF-MS

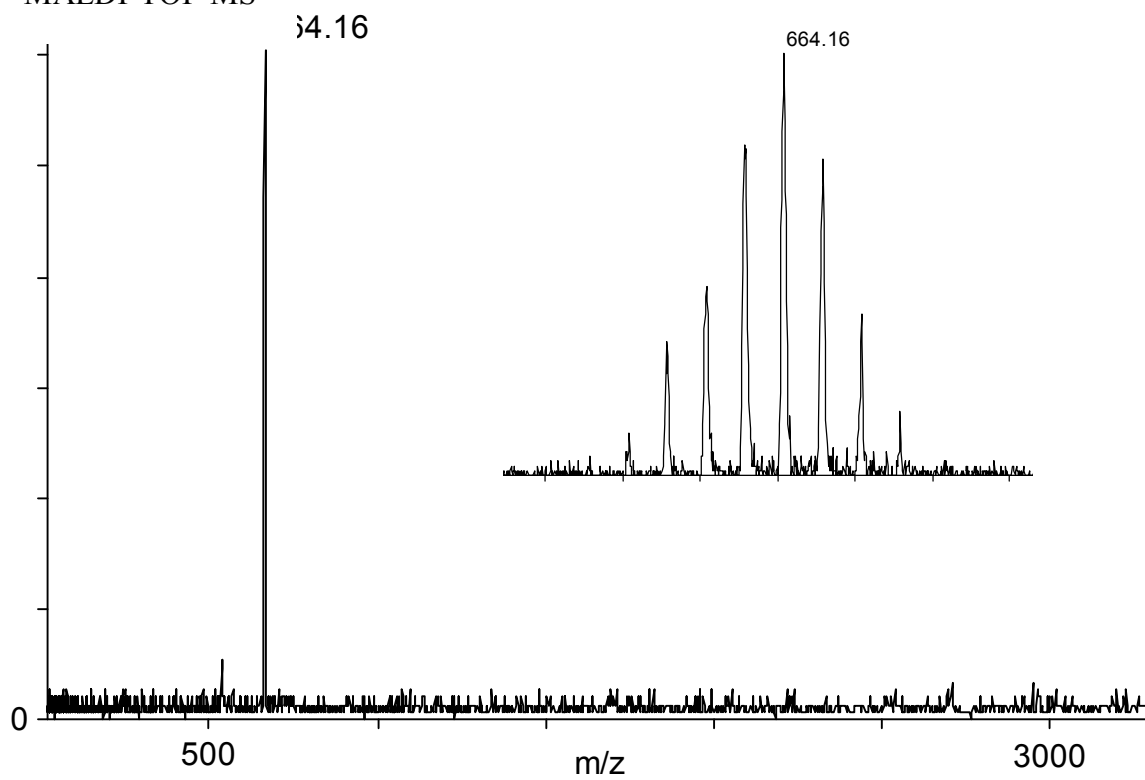

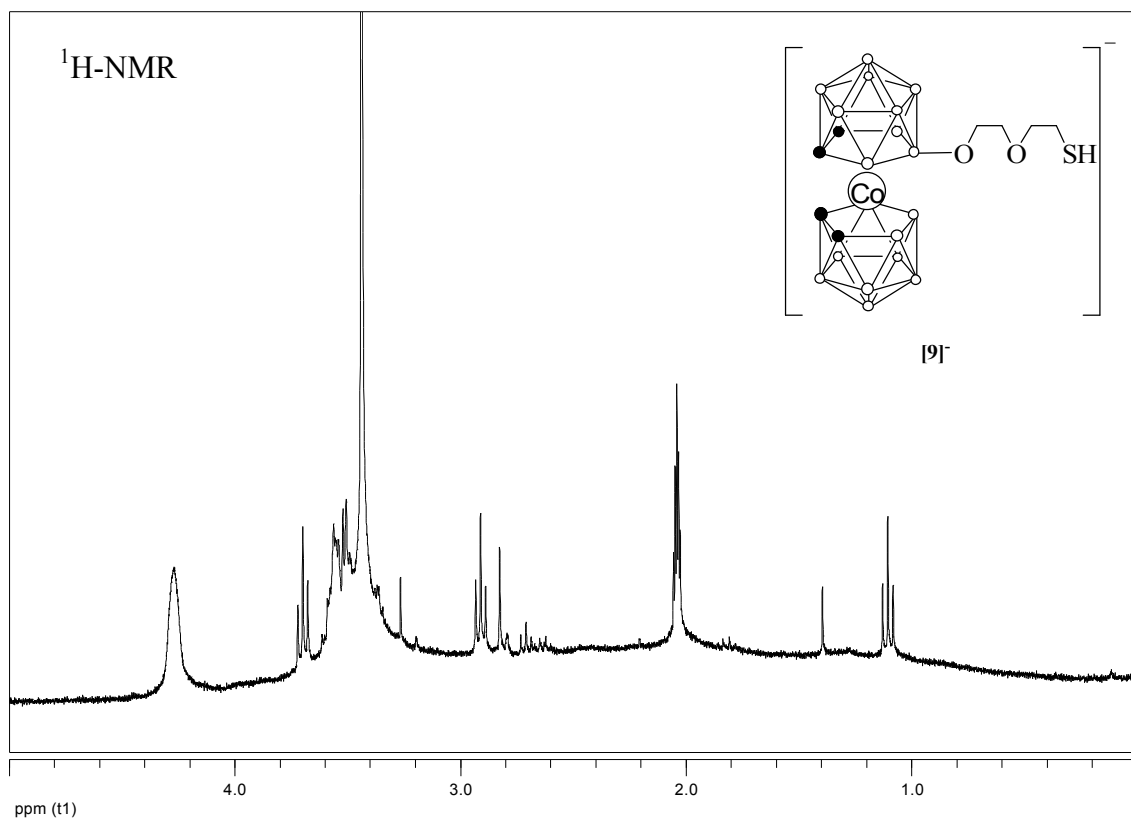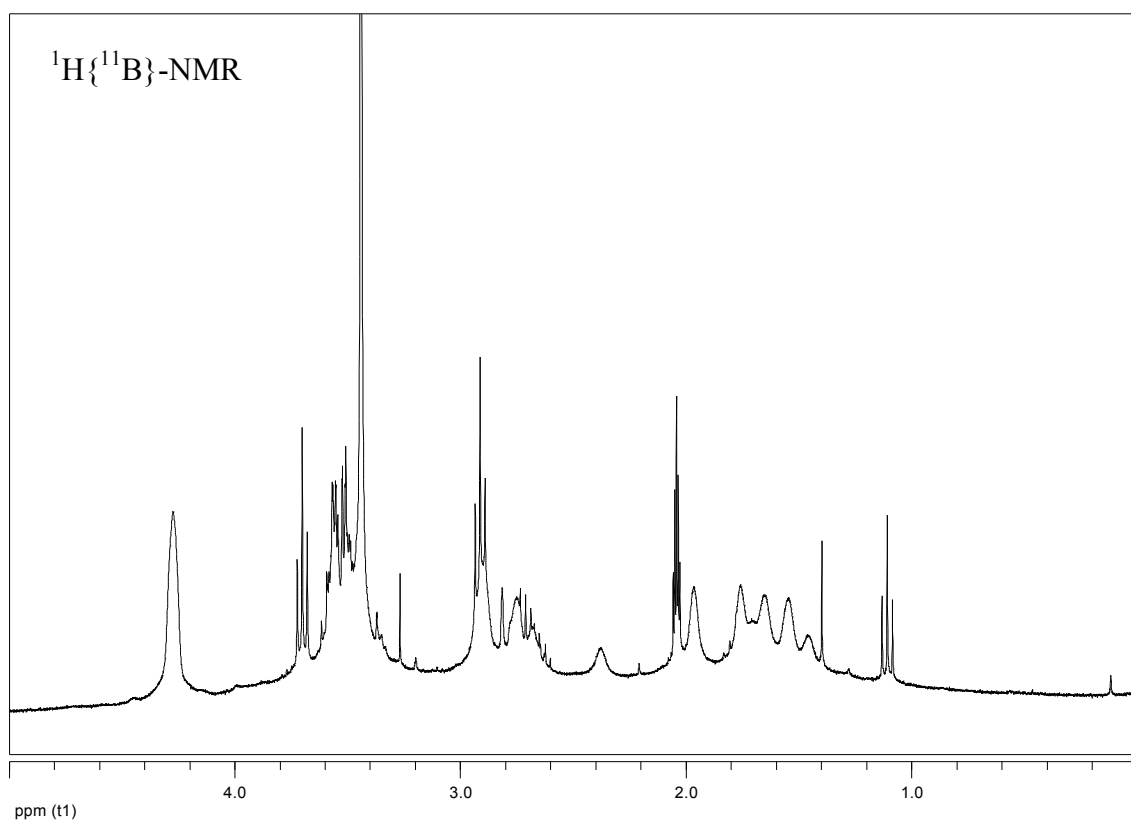

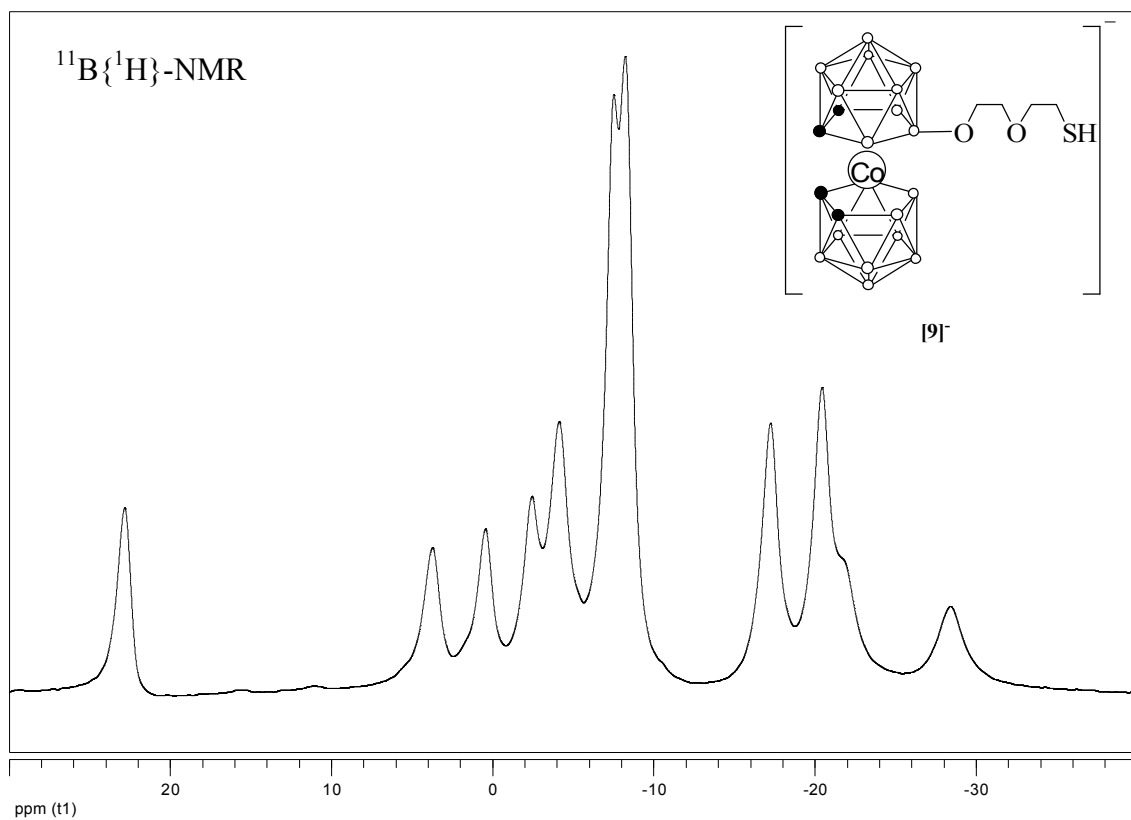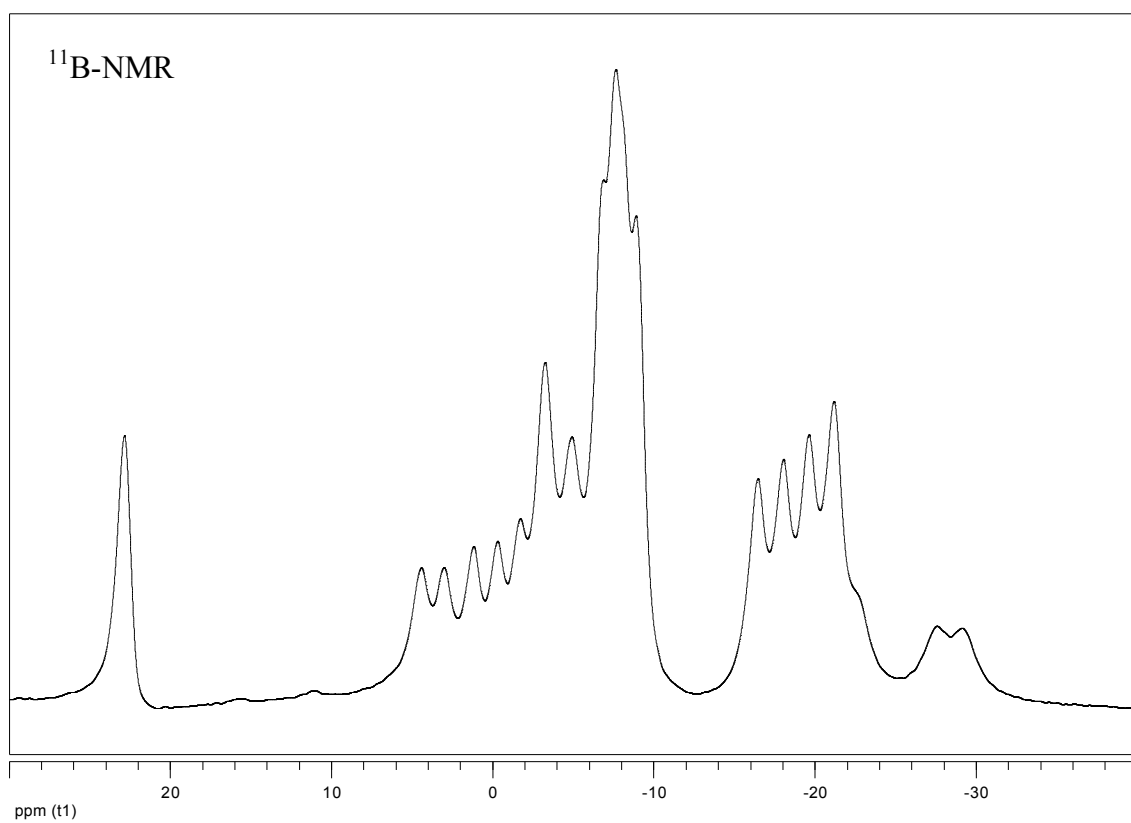

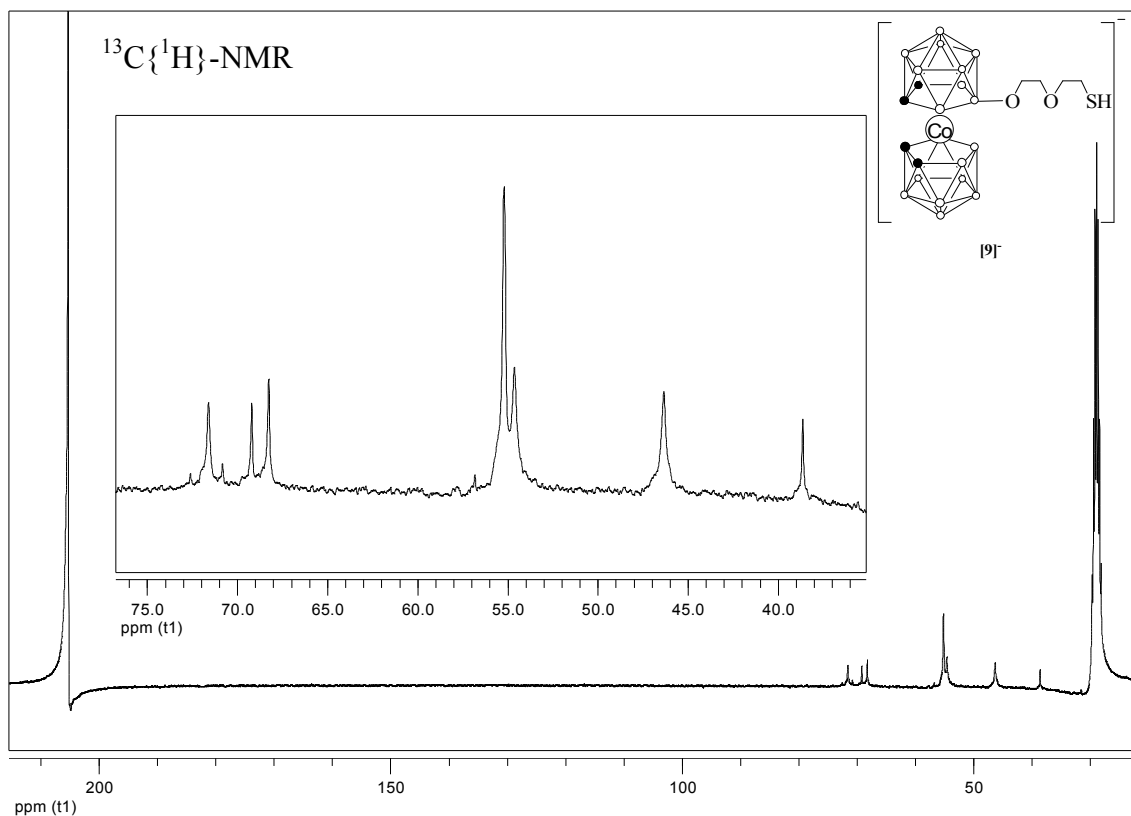

MALDI-TOF-MS

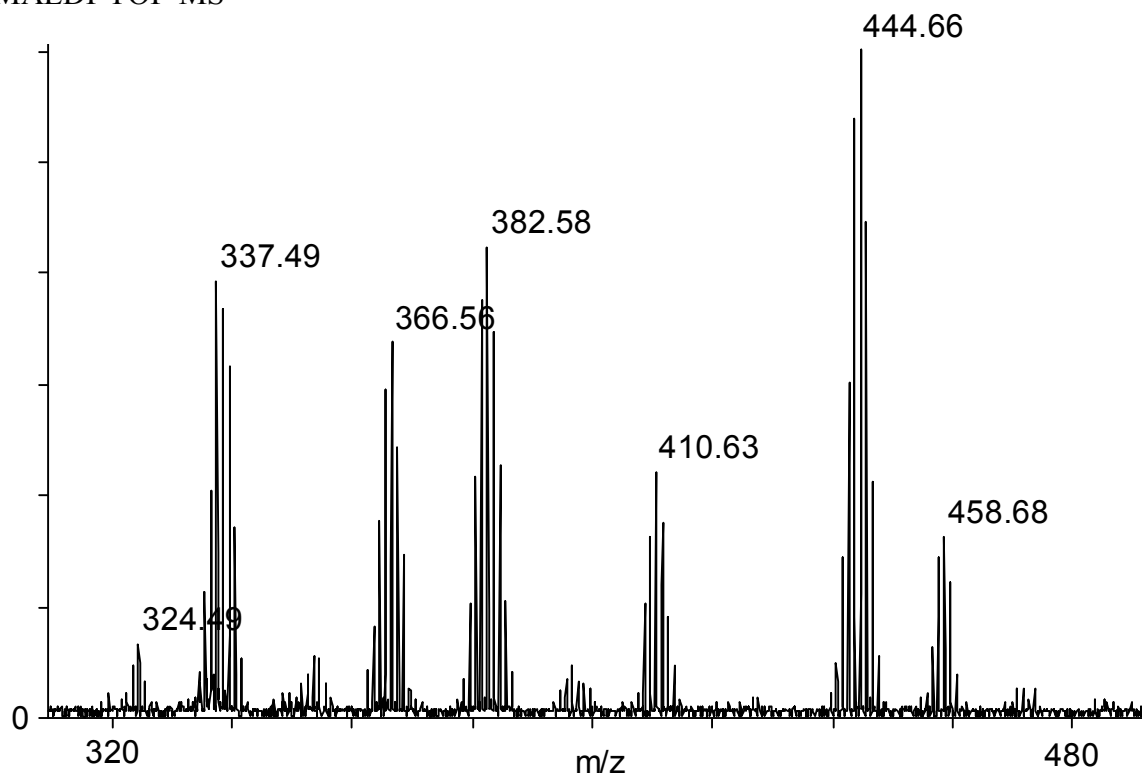

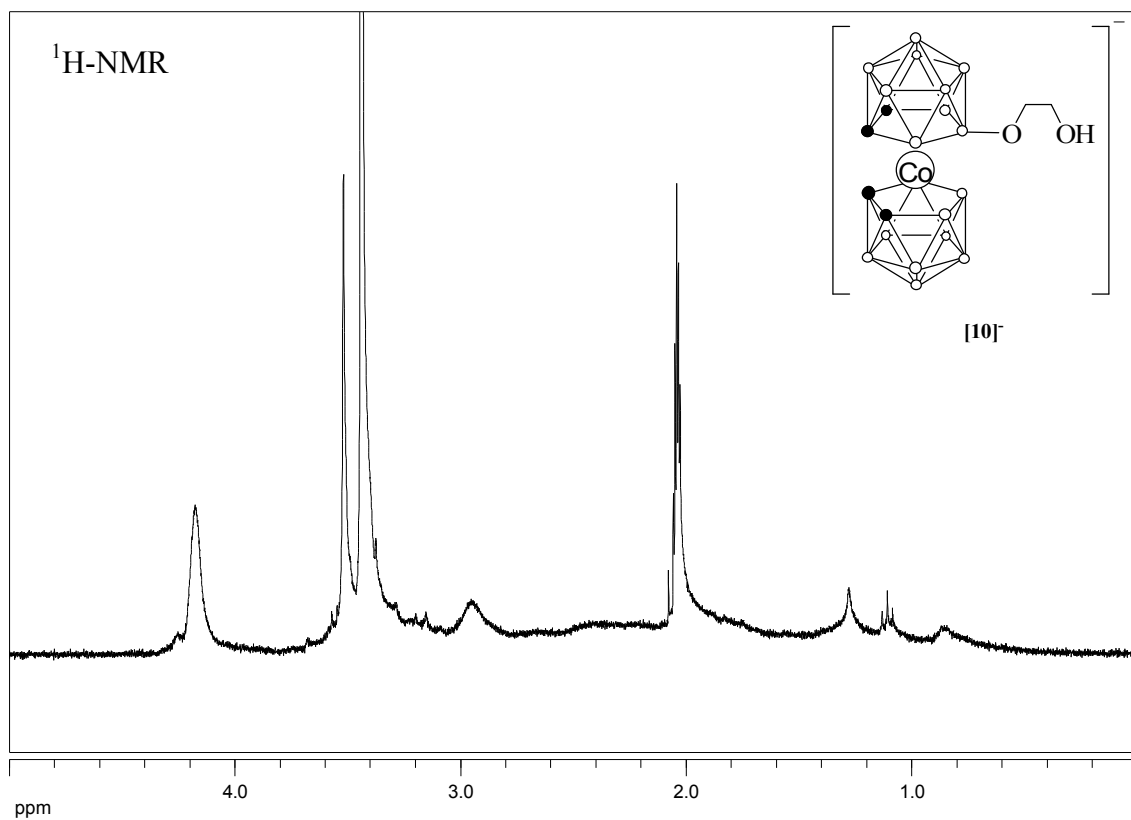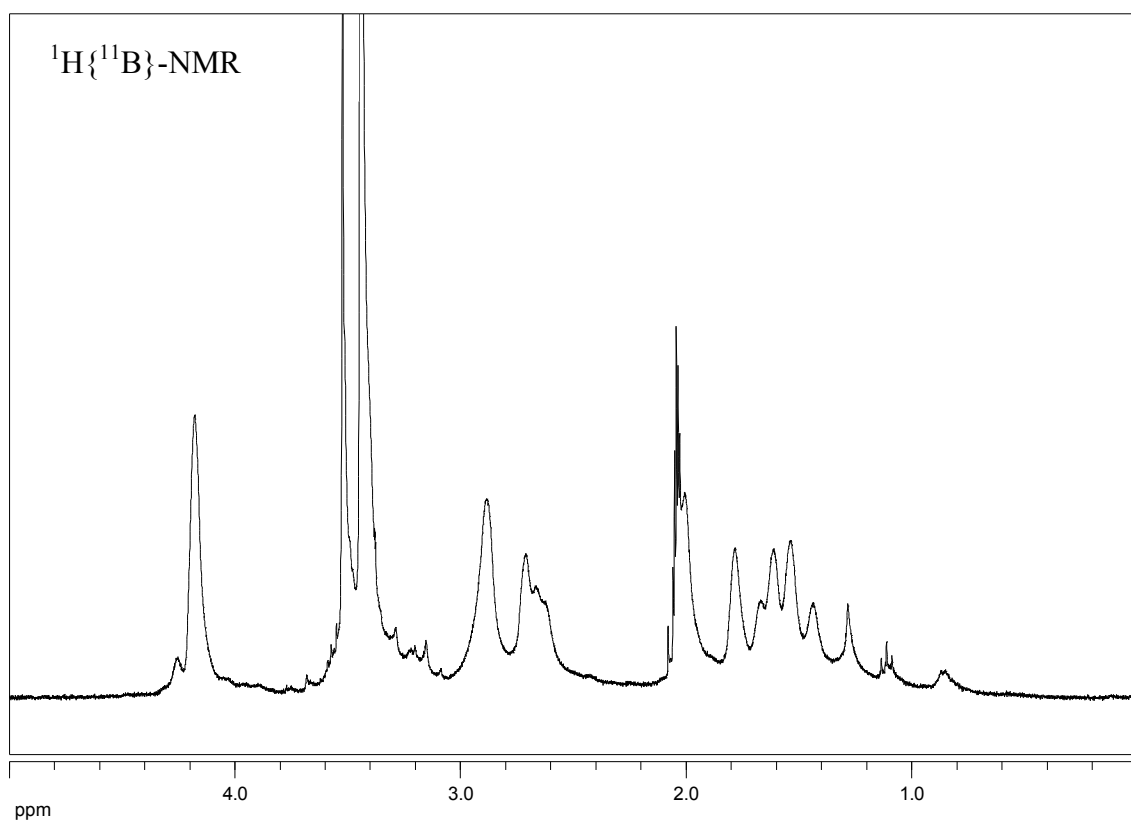

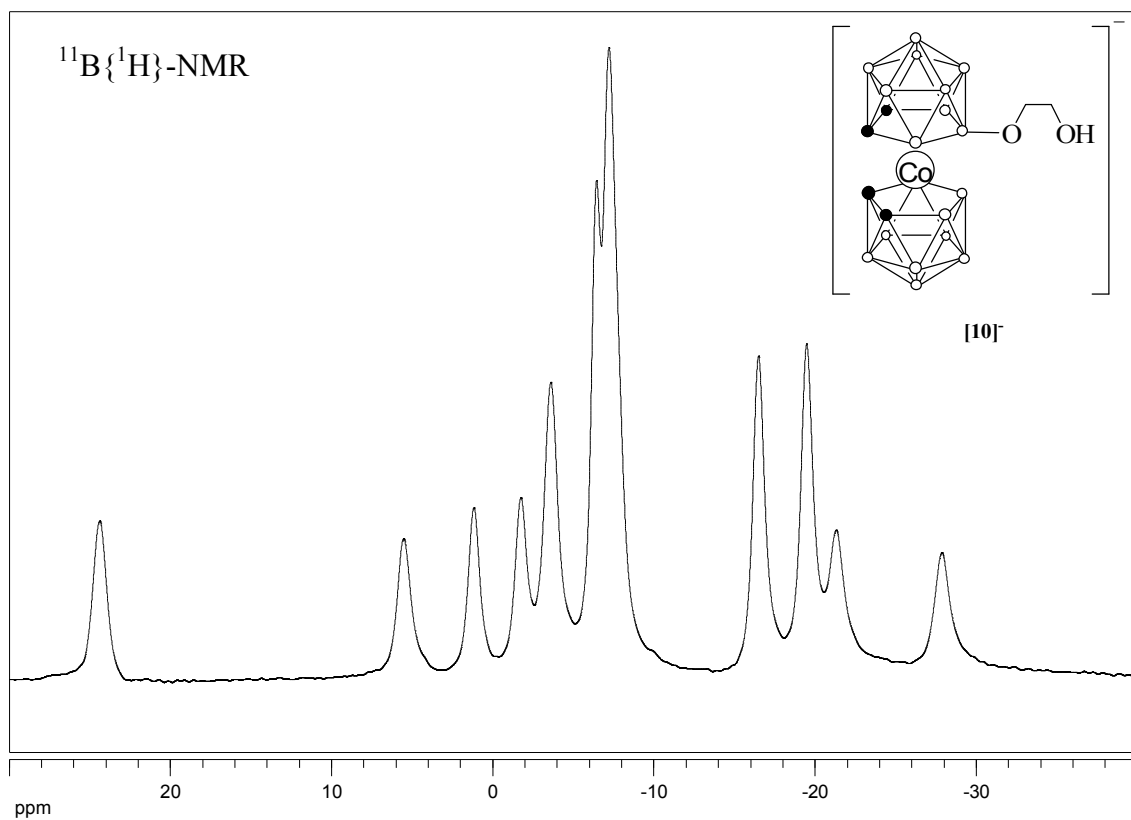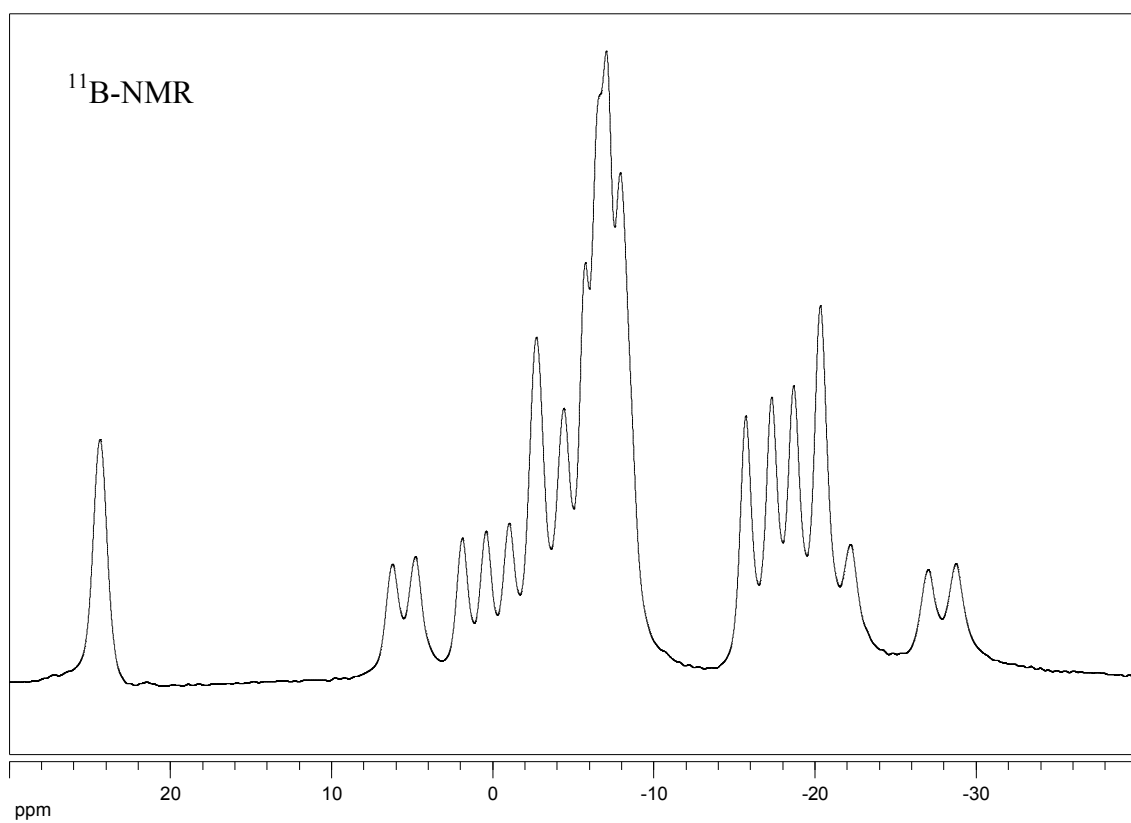

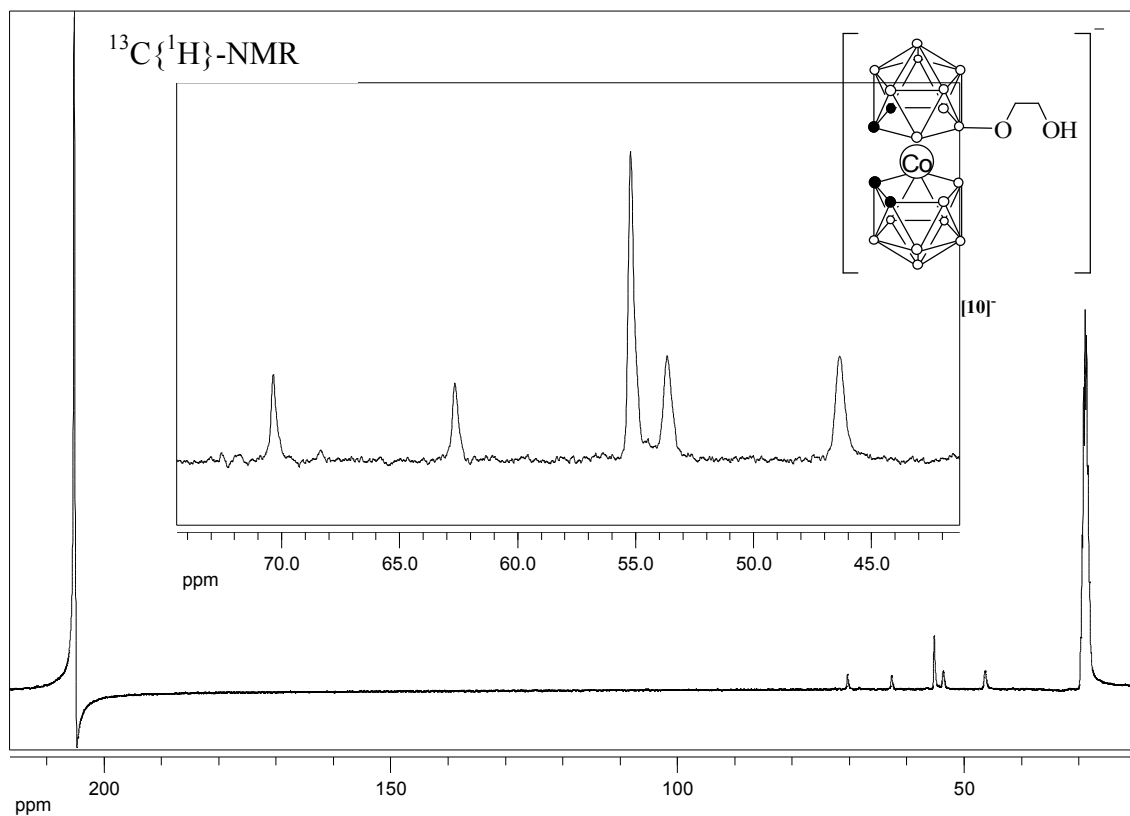

MALDI-TOF-MS

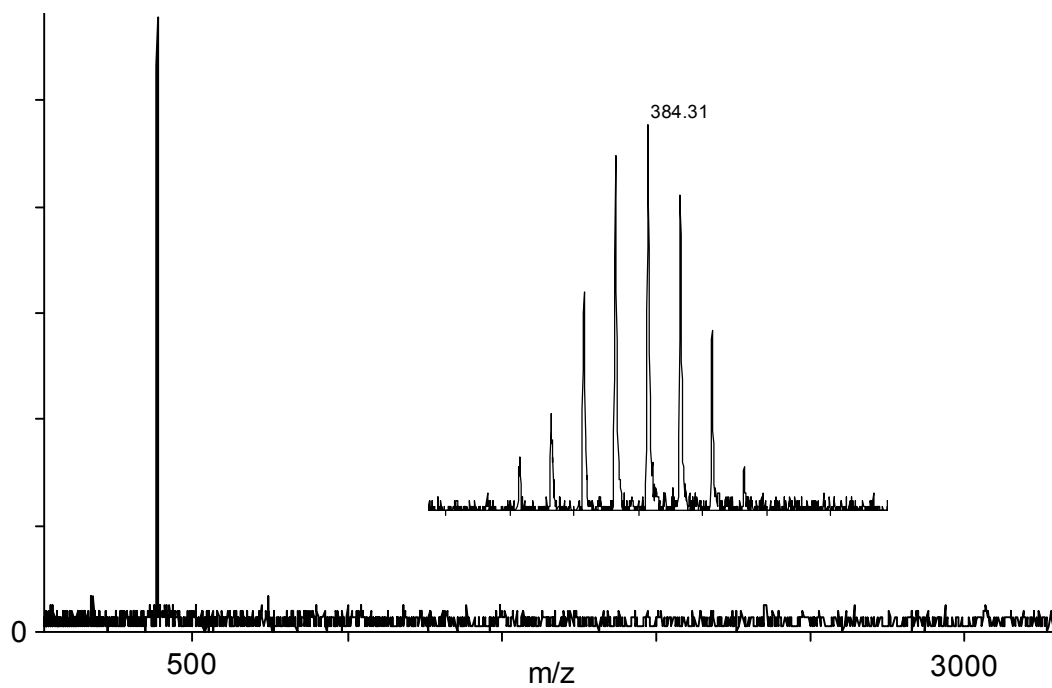

### **X-ray Structure Determinations of N(CH<sub>3</sub>)<sub>4</sub>[5] and N(CH<sub>3</sub>)<sub>4</sub>[6]:**

Single-crystal data collections for N(CH<sub>3</sub>)<sub>4</sub>[5] and N(CH<sub>3</sub>)<sub>4</sub>[6] were performed at –100° with an Enraf Nonius KappaCCD diffractometer using graphite monochromatized Mo K<sub>α</sub> radiation. The structures were solved by direct methods and refined on F<sup>2</sup> by the SHELXL97 program.<sup>2</sup> The non-hydrogen atoms were refined with anisotropic displacement parameters. The hydrogen atoms were treated as riding atoms using the SHELXL97 default parameters. The crystallographic, structure refinement and bond parameters for N(CH<sub>3</sub>)<sub>4</sub>[5] and N(CH<sub>3</sub>)<sub>4</sub>[6] are reported in CIF-files deposited at CCDC with the reference numbers 738981 and 738982. These data can be obtained free of charge via [www.ccdc.cam.ac.uk/conts/retrieving.html](http://www.ccdc.cam.ac.uk/conts/retrieving.html) (or from the Cambridge Crystallographic Data Centre, 12 Union Road, Cambridge CB2 1EZ, U.K.; fax: (+44) 1223-336033; or e-mail: [deposit@ccdc.cam.ac.uk](mailto:deposit@ccdc.cam.ac.uk)).

### **References**

---

<sup>1</sup> I. Rojo, J. Pedrajas, F. Teixidor, C. Viñas, R. Kivekas, R. Sillanpää, I. Sivaev, V. Bregadze, S. Sjöberg. *Organometallics* **2003**, *22*, 3414.

<sup>2</sup> Sheldrick, G.M. *Acta Cryst.* **2008**, A64, 112.
